# Supplementary material for: Exploiting the DNA Damaging Activity of Liposomal Low Dose Cytarabine for Cancer Immunotherapy
Source: MDPI journal article supplement (doi:10.3390/pharmaceutics14122710), 2022-12-03

# SUPPLEMENTAL INFORMATION

## Exploiting the DNA damaging activity of liposomal low dose cytarabine for cancer immunotherapy

Jordan D. Lewicky <sup>1,†</sup>, Alexandrine L. Martel <sup>1,†</sup>, Nya L. Fraleigh <sup>1</sup>, Emilie Picard <sup>1,2</sup>, Leila Mousavifar <sup>3</sup>, Arnaldo Nakamura <sup>4</sup>, Francisco Diaz-Mitoma <sup>5</sup>, René Roy <sup>3,\*</sup>, Hoang-Thanh Le <sup>1,5,\*</sup>

<sup>1</sup> Health Sciences North Research Institute, 56 Walford Road, Sudbury, ON P3E 2H2, Canada

<sup>2</sup> Cancer Research Center of Lyon, 28 rue Laennec, 69008 Lyon, France

<sup>3</sup> Glycosciences and Nanomaterial Laboratory, Université du Québec à Montréal, P.O. Box 8888, Succ. Centre-Ville, Montréal, QC H3C 3P8, Canada

<sup>4</sup> Armand-Frappier Santé Biotechnologie Research Centre, Institut National de la Recherche Scientifique, 531 Boulevard des Prairies, Laval, QC H7V 1B7, Canada

<sup>5</sup> Medicinal Sciences Division, NOSM University, 935 Ramsey Lake Road, Sudbury, ON P3E 2C6, Canada

† These authors contributed equally to this work.

\* Correspondence: roy.rene@uqam.ca (R.R.); hle@hsnri.ca (H.-T.L.)

### Figure 1 Raw Western Blot Images

|                                                       |   |
|-------------------------------------------------------|---|
| A2780 & A780R, 24 hours, $\gamma$ -H2AX.....          | 3 |
| A2780 & A2780R, 24 hours, GAPDH.....                  | 4 |
| HCT 116 & HT-29, 24 hours, $\gamma$ -H2AX.....        | 5 |
| HCT 116 & HT-29, 24 hours, GAPDH.....                 | 6 |
| PBMC & THP1-Macrophage, 24 hours, $\gamma$ -H2AX..... | 7 |
| PBMC & THP1-Macrophage, 24 hours, GAPDH.....          | 8 |

### Figure 2 Raw Western Blot Images

|                                |    |
|--------------------------------|----|
| A2780, 6 hours, P-TBK1.....    | 9  |
| A2780, 6 hours, P-IRF3.....    | 10 |
| A2780, 6 hours, P-STING.....   | 11 |
| A2780, 6 hours, GAPDH.....     | 12 |
| A2780R, 6 hours, P-TBK1.....   | 13 |
| A2780R, 6 hours, P-IRF3.....   | 14 |
| A2780R, 6 hours, P-STING.....  | 15 |
| A2780R, 6 hours, GAPDH.....    | 16 |
| HCT 116, 6 hours, P-TBK1.....  | 17 |
| HCT 116, 6 hours, P-IRF3.....  | 18 |
| HCT 116, 6 hours, P-STING..... | 19 |

|                                        |    |
|----------------------------------------|----|
| HCT 116, 6 hours, GAPDH.....           | 20 |
| HT-29, 6 hours, P-TBK1.....            | 21 |
| HT-29, 6 hours, P-IRF3.....            | 22 |
| HT-29, 6 hours, P-STING.....           | 23 |
| HT-29, 6 hours, GAPDH.....             | 24 |
| THP1-Macrophage, 6 hours, P-TBK1.....  | 25 |
| THP1-Macrophage, 6 hours, P-IRF3.....  | 26 |
| THP1-Macrophage, 6 hours, P-STING..... | 27 |
| THP1-Macrophage, 6 hours, GAPDH.....   | 28 |
| PBMC, 6 hours, P-TBK1.....             | 29 |
| PBMC, 6 hours, P-IRF3.....             | 30 |
| PBMC, 6 hours, P-STING.....            | 31 |
| PBMC, 6 hours, GAPDH.....              | 32 |

# Figure 1 Raw Western Blot Images

A2780 & A2780R, 24 hours,  $\gamma$ -H2AX:

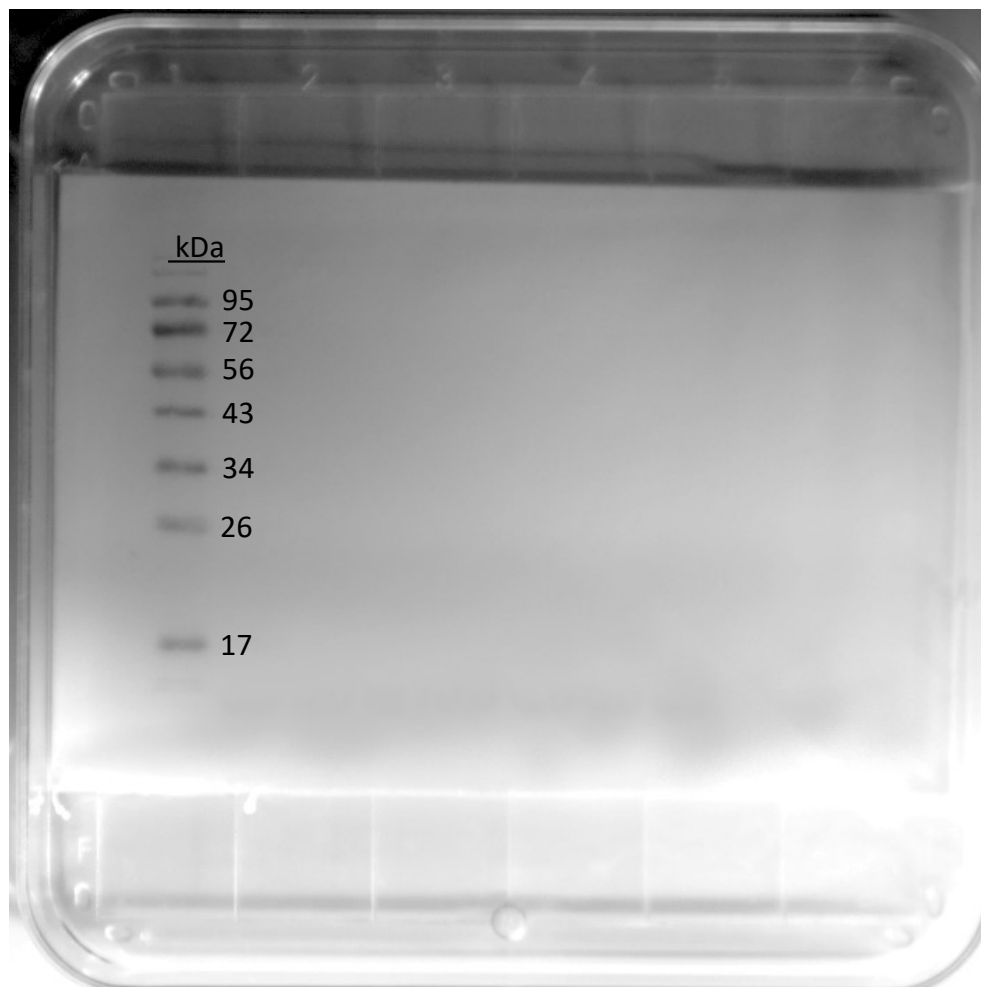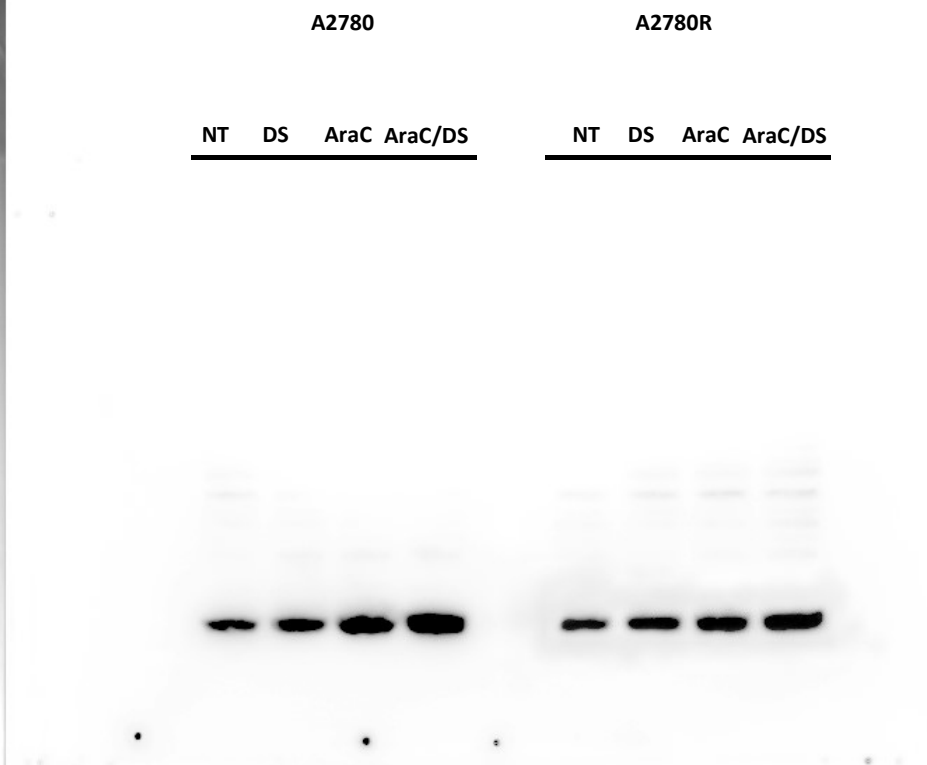

# A2780 & A2780R, 24 hours, GAPDH:

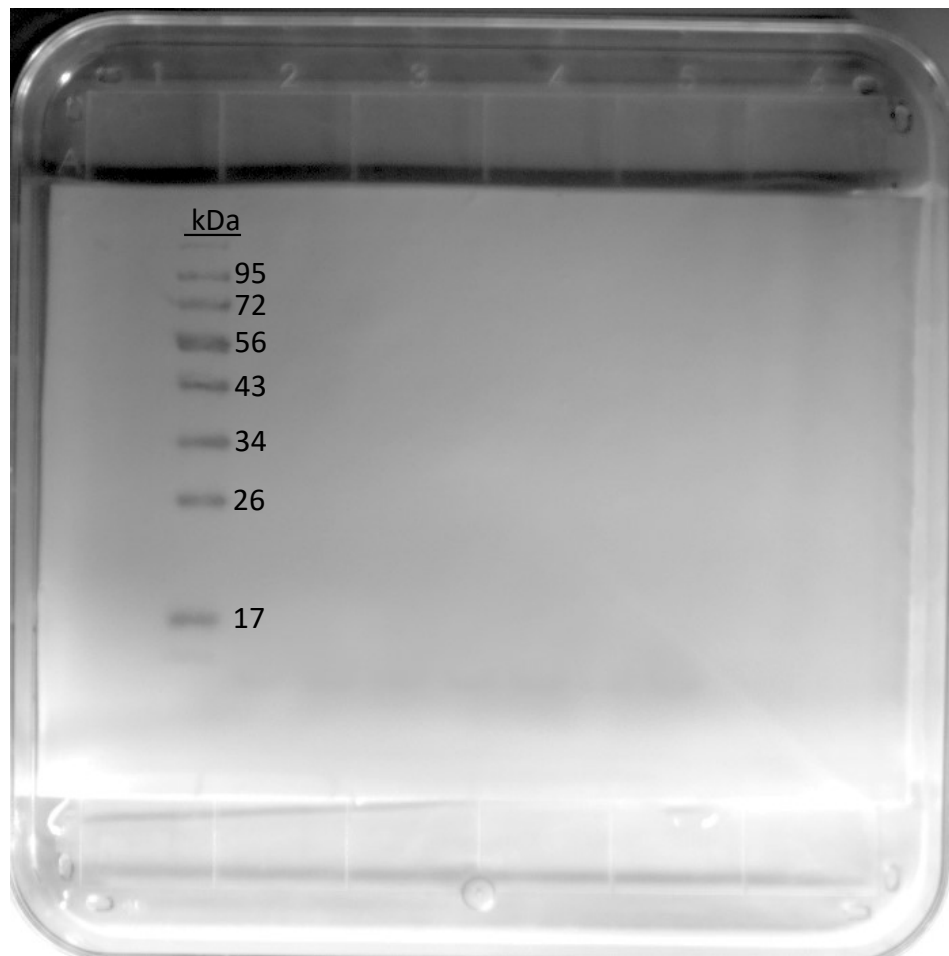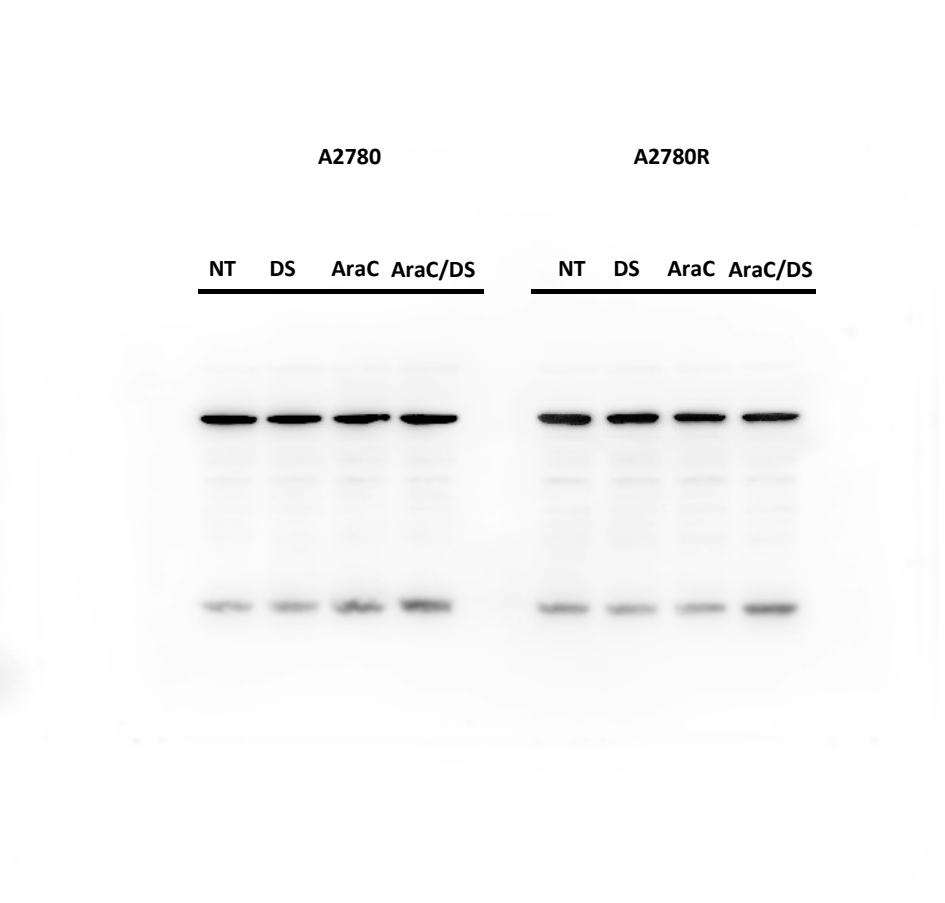

HCT 116 & HT-29, 24 hours,  $\gamma$ -H2AX:

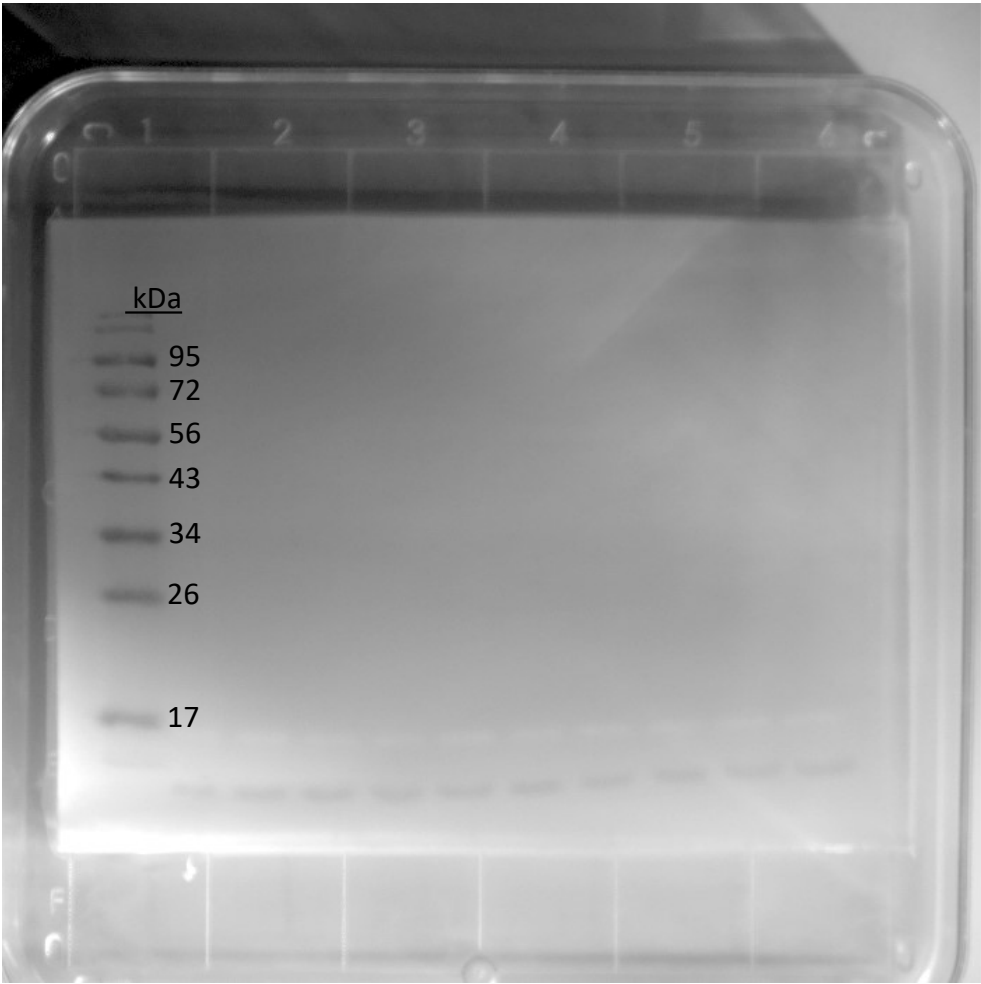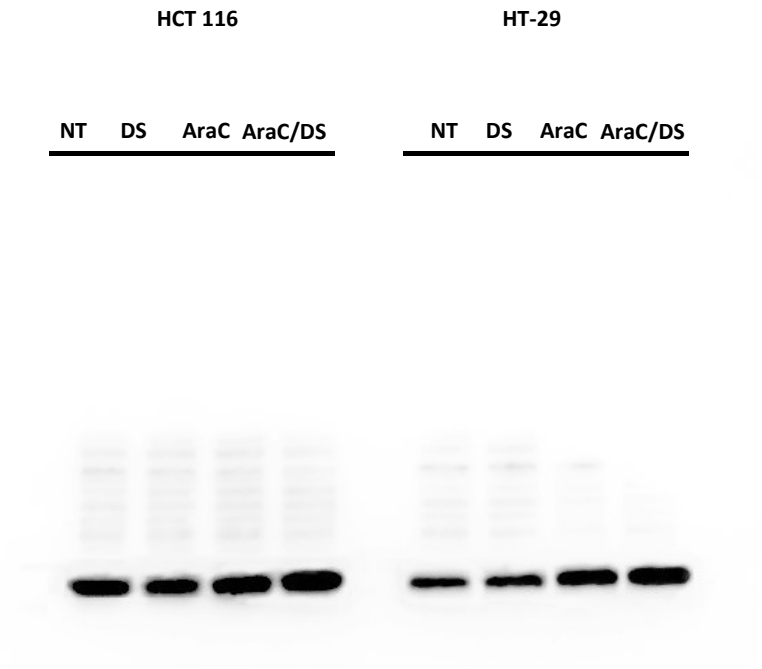

HCT 116 & HT-29, 24 hours, GAPDH:

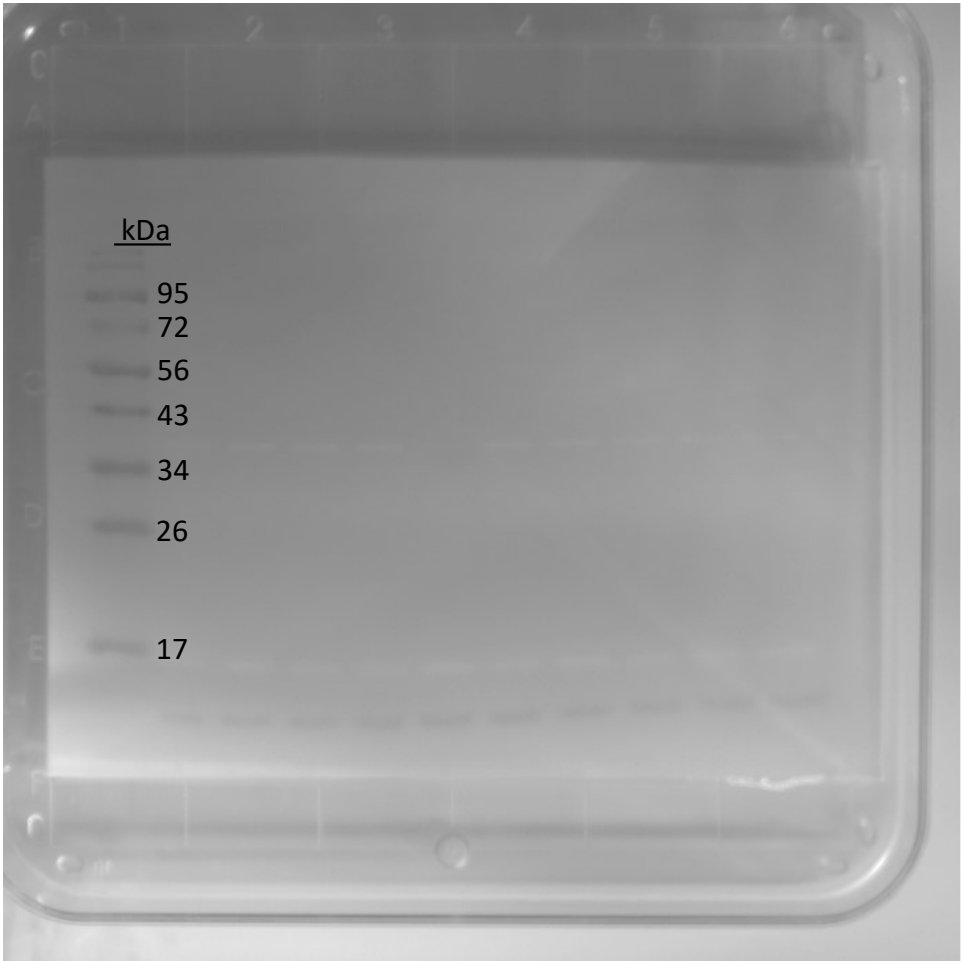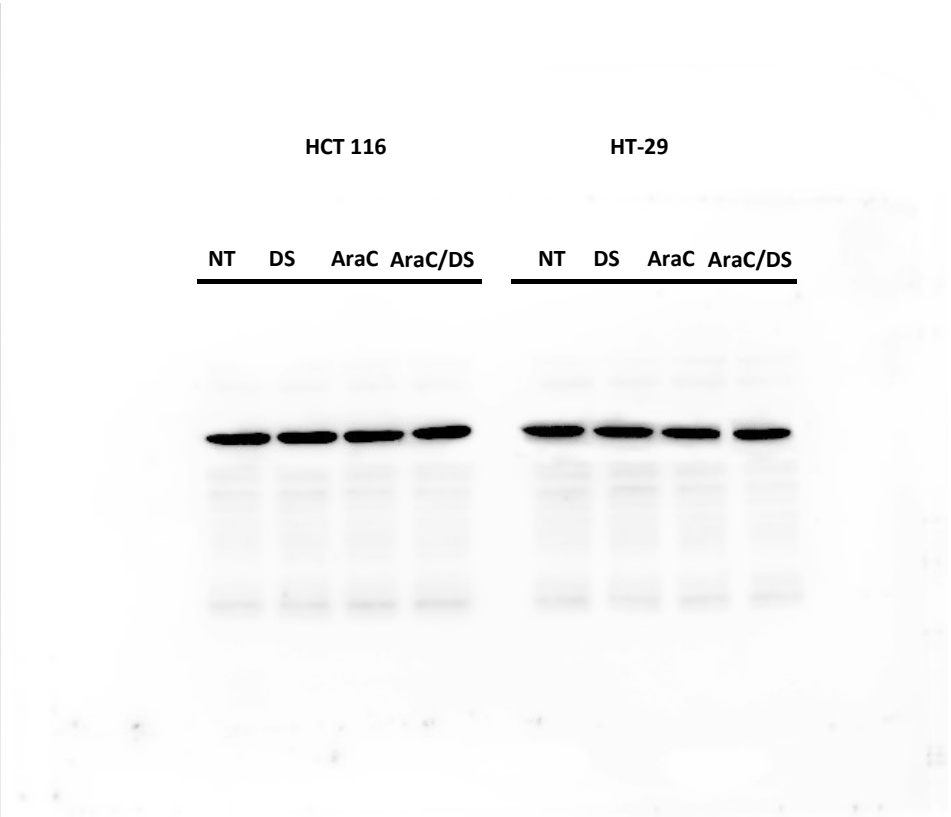

## PBMC & THP1-Macrophage, 24 hours, $\gamma$ -H2AX:

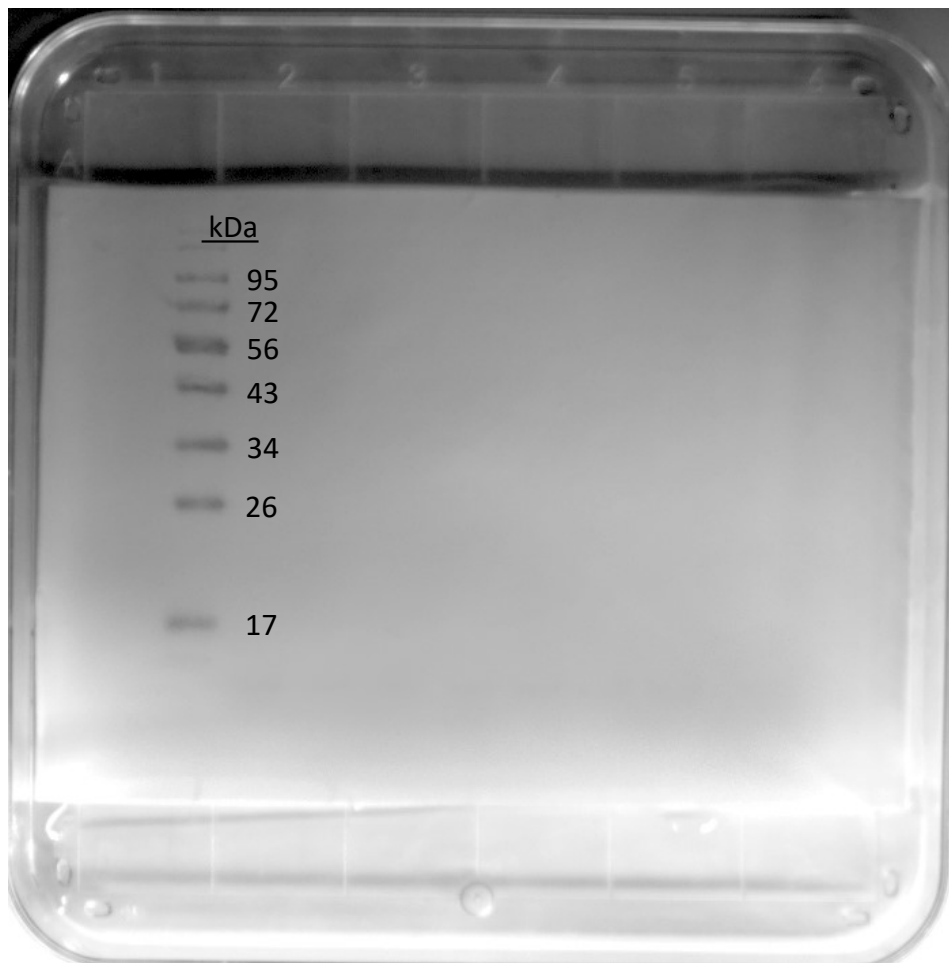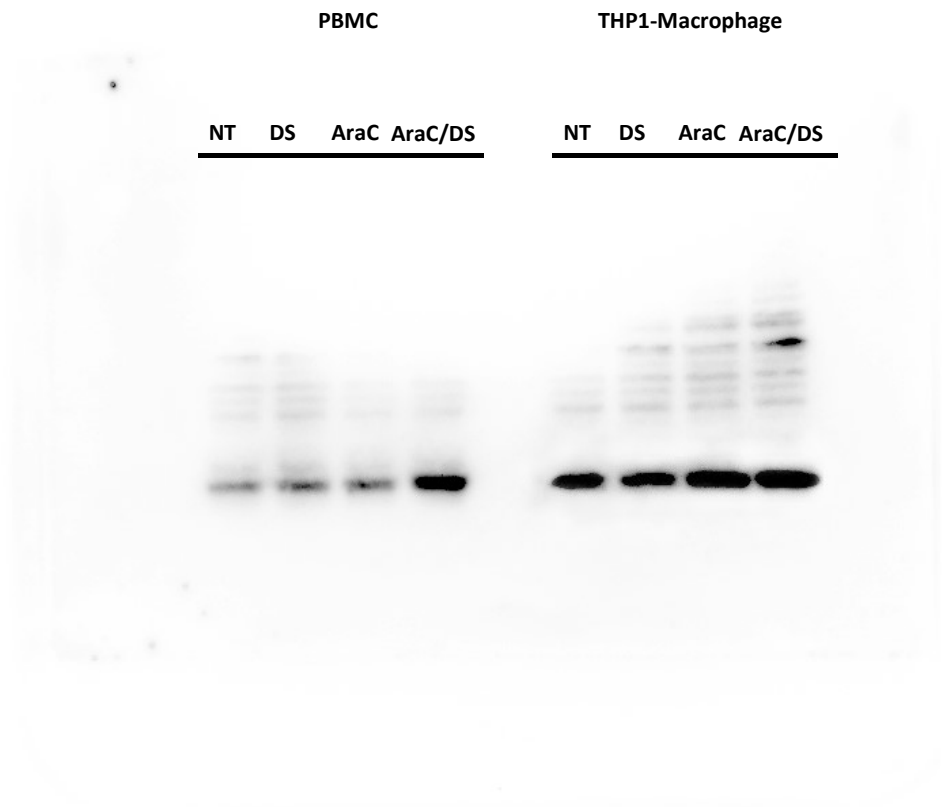

PBMC & THP1-Macrophage, 24 hours, GAPDH:

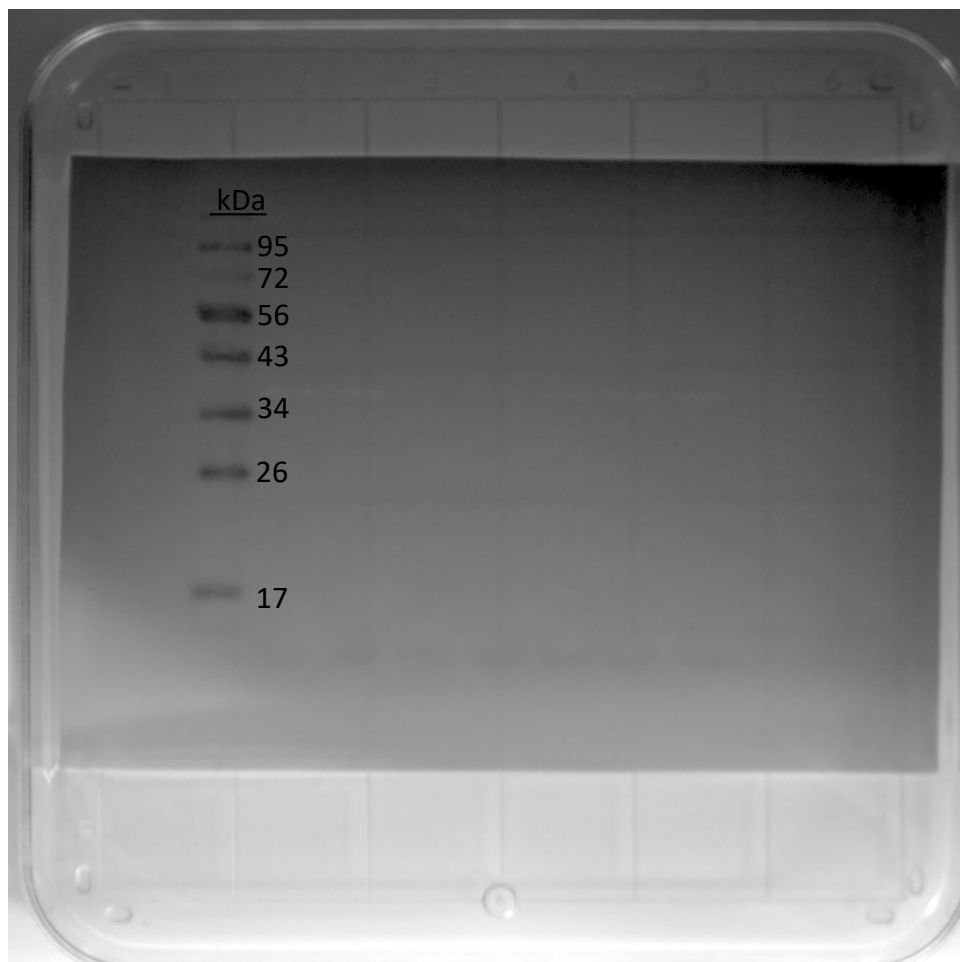

| PBMC |    |      |         | THP1-Macrophage |    |      |         |
|------|----|------|---------|-----------------|----|------|---------|
| NT   | DS | AraC | AraC/DS | NT              | DS | AraC | AraC/DS |

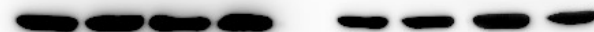

## Figure 2 Raw Western Blot Images

A2780, 6 hours, P-TBK1:

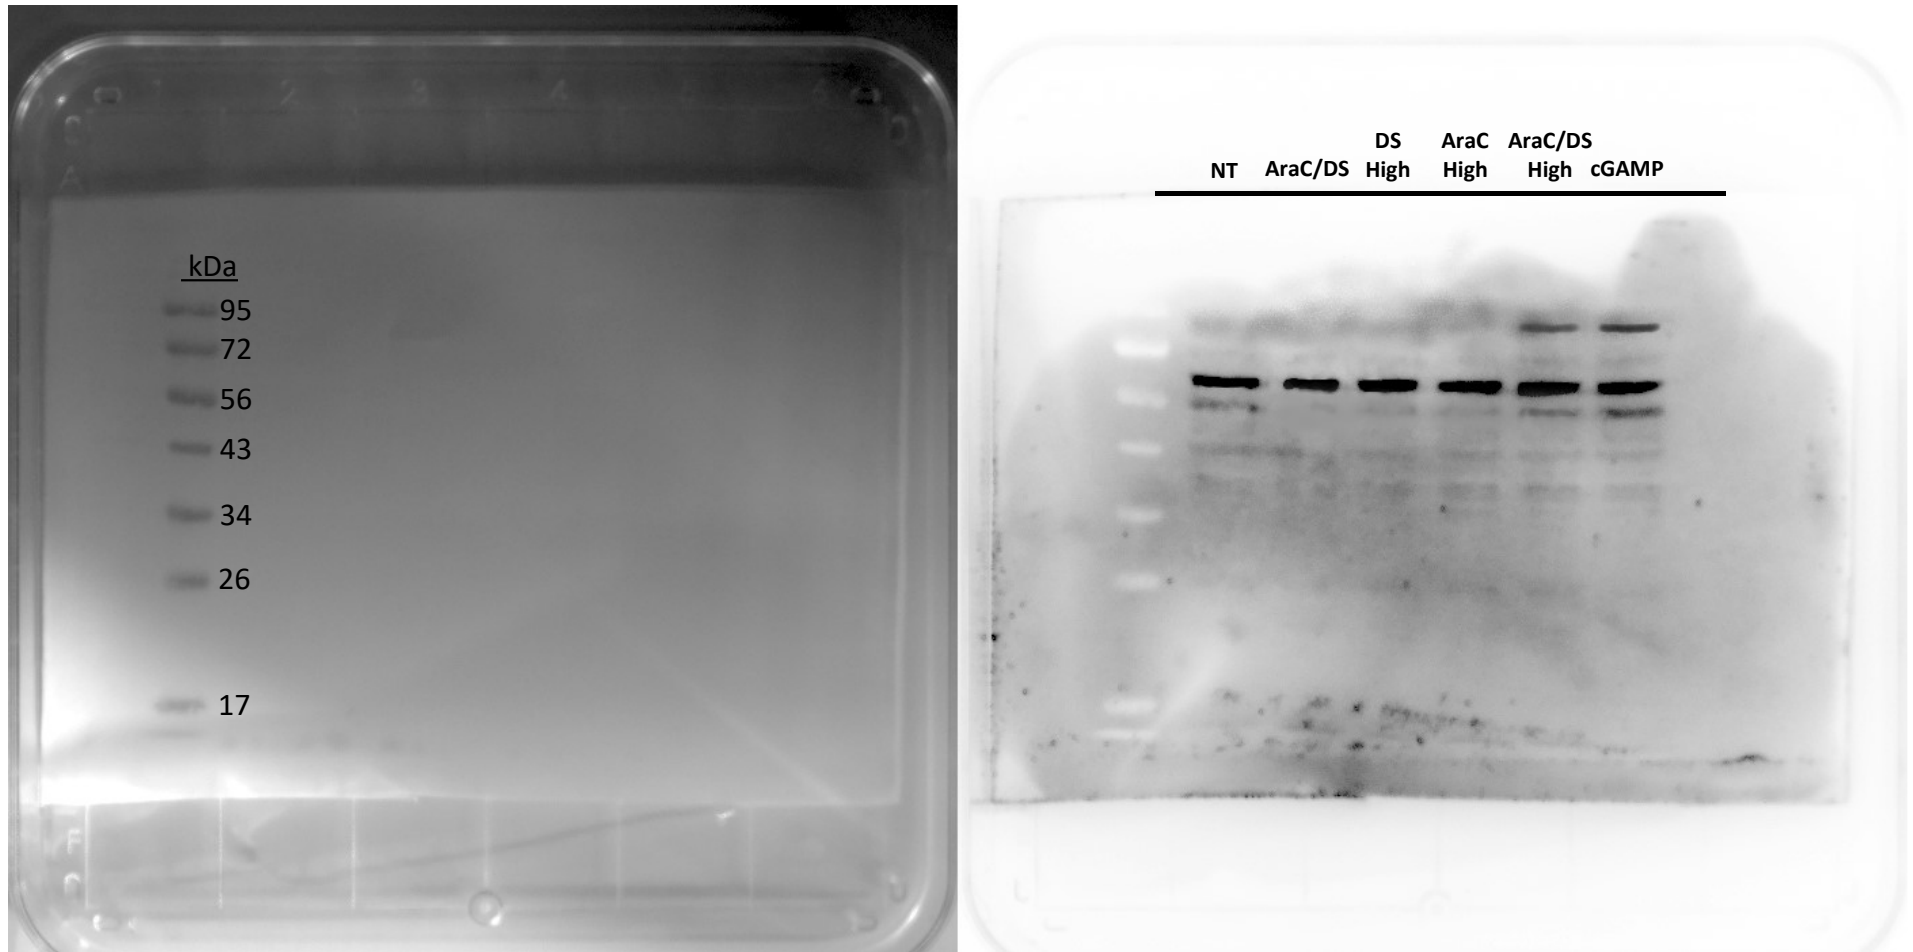

A2780, 6 hours, P-IRF3:

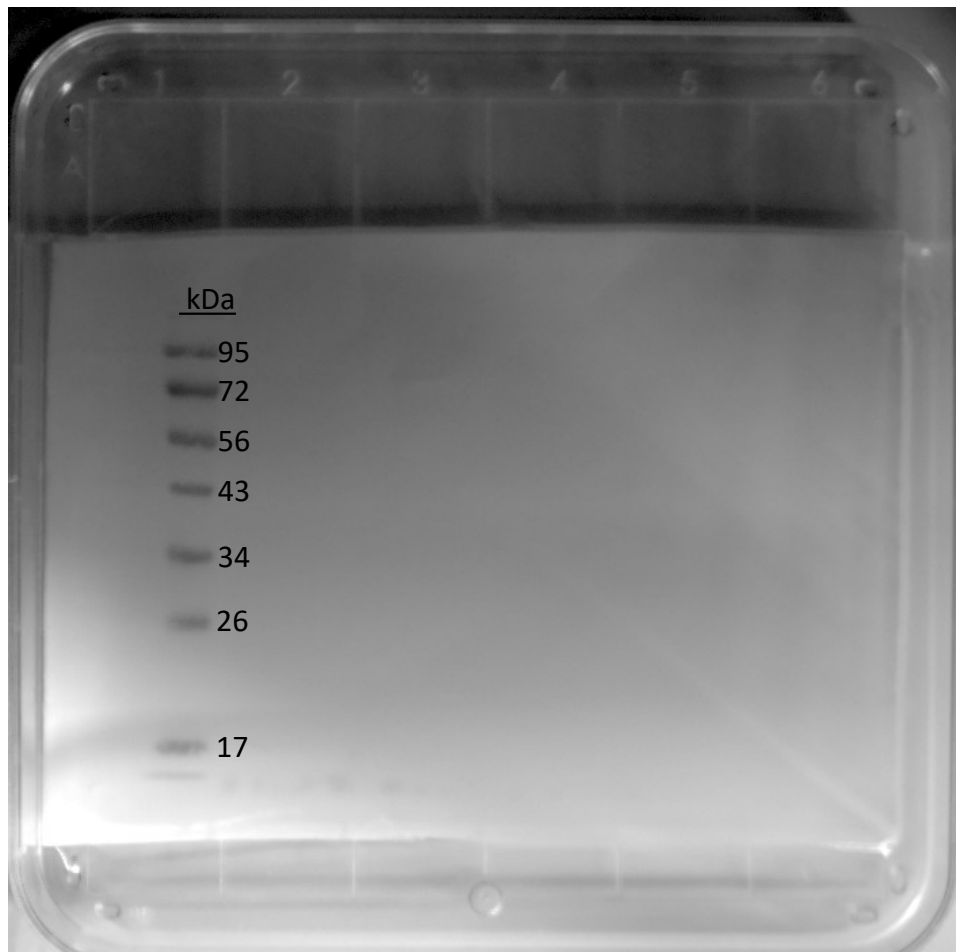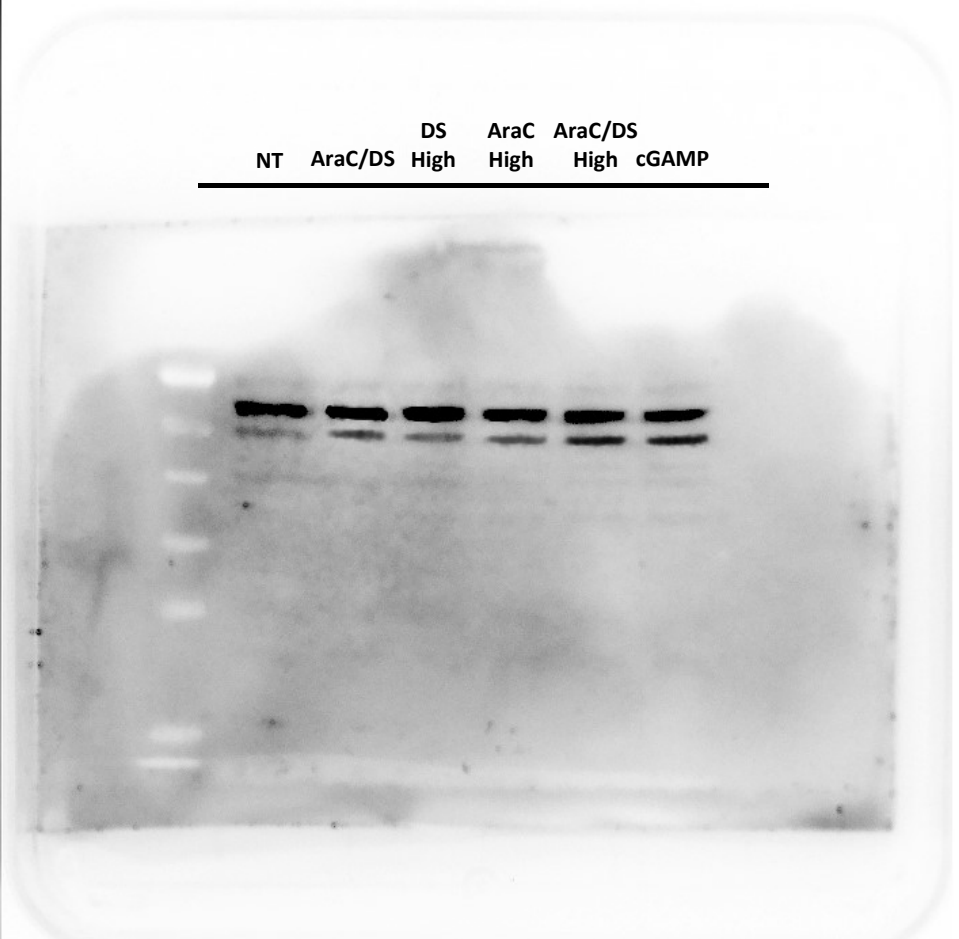

A2780, 6 hours, P-STING:

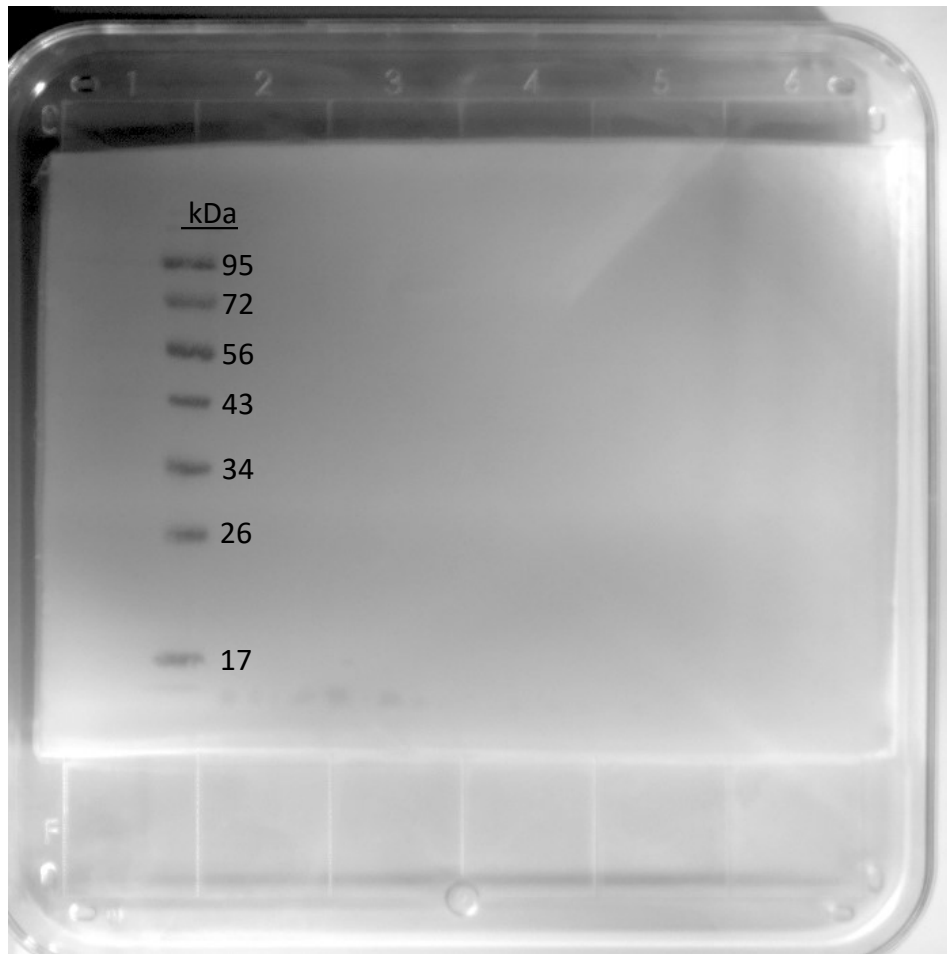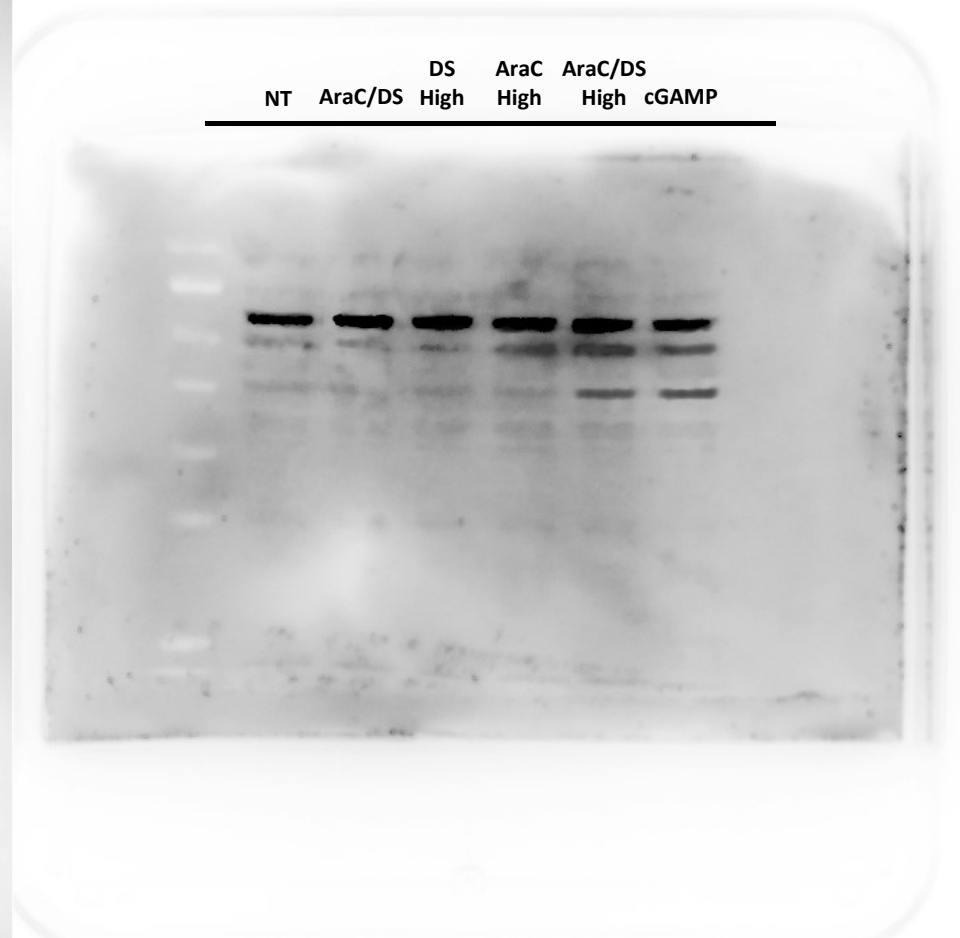

A2780, 6 hours, GAPDH:

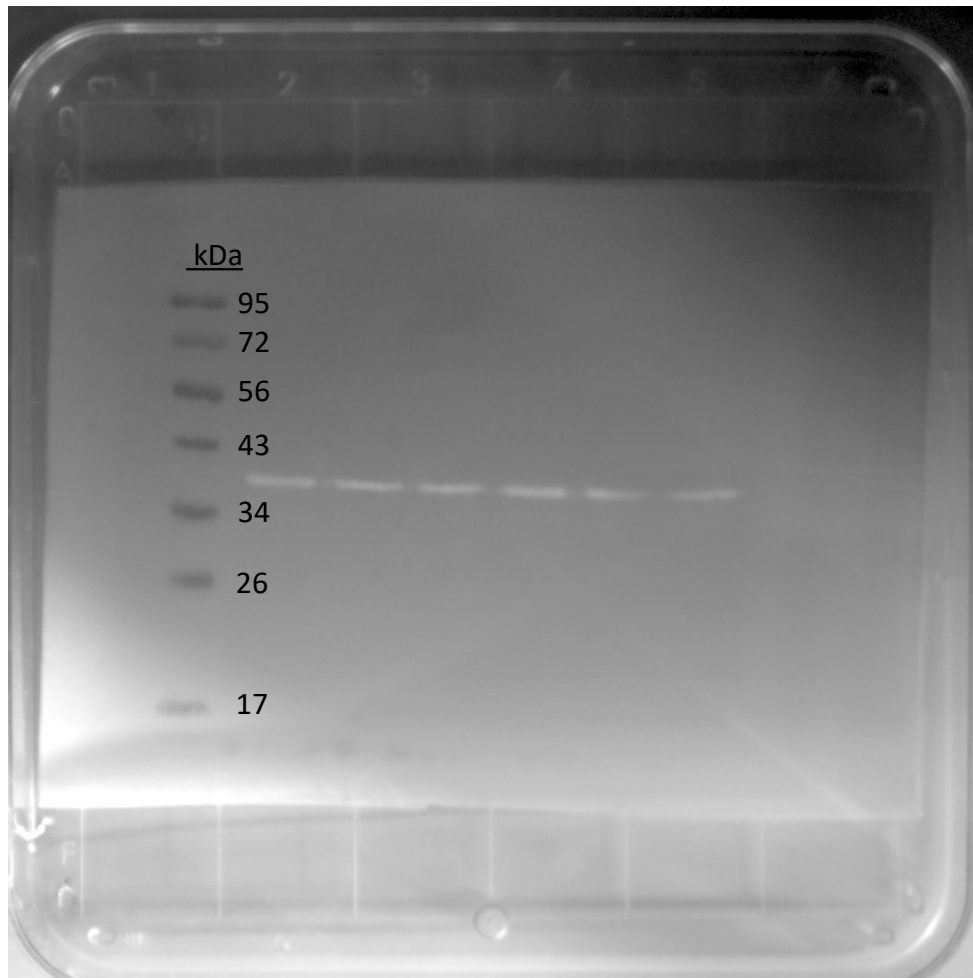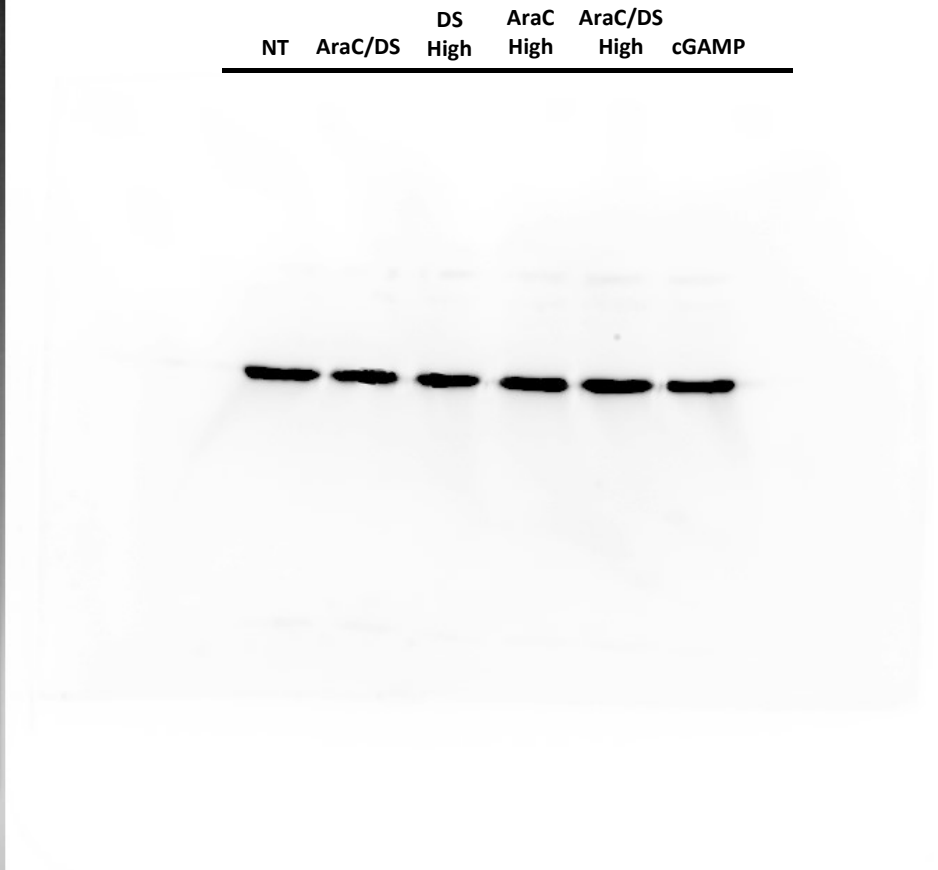

A2780R, 6 hours, P-TBK1:

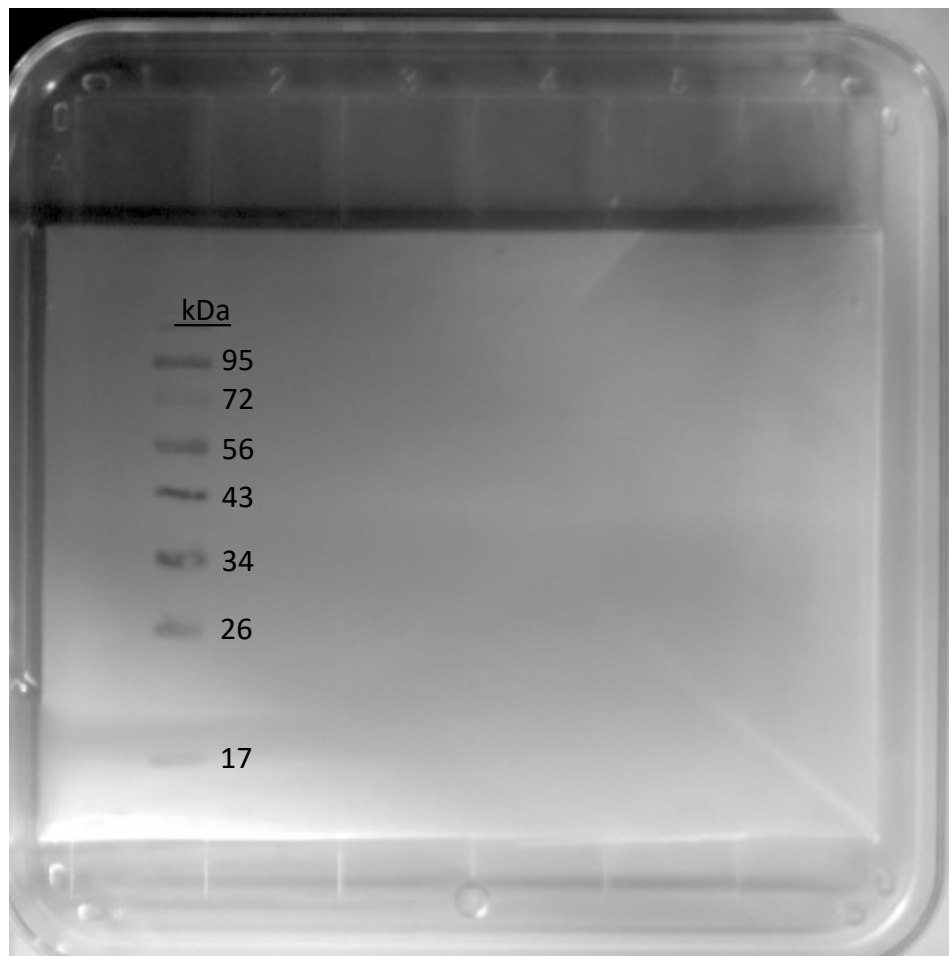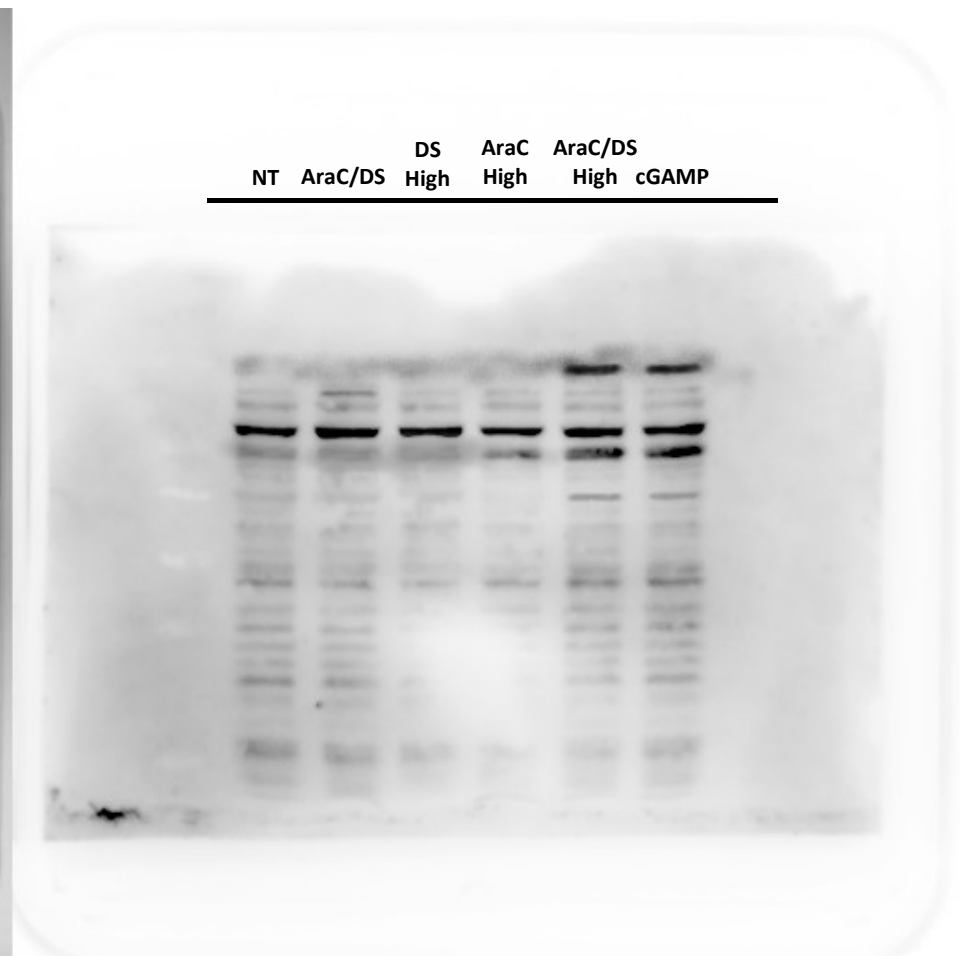

A2780R, 6 hours, P-IRF3:

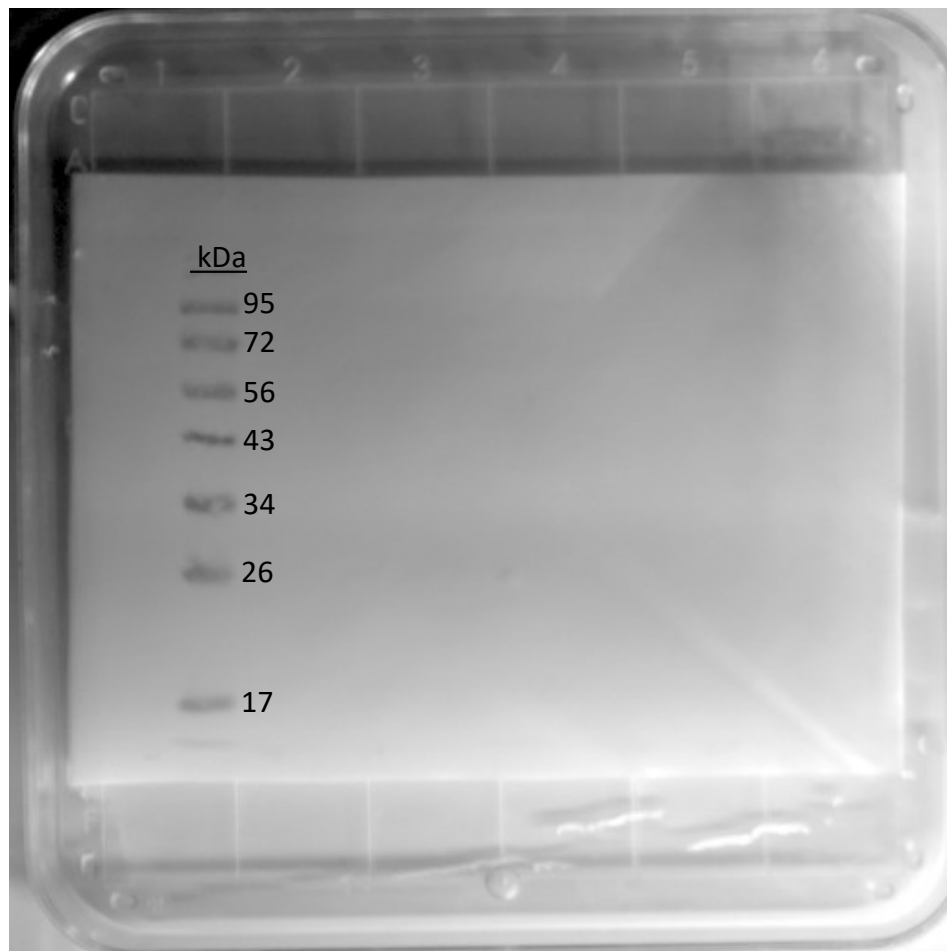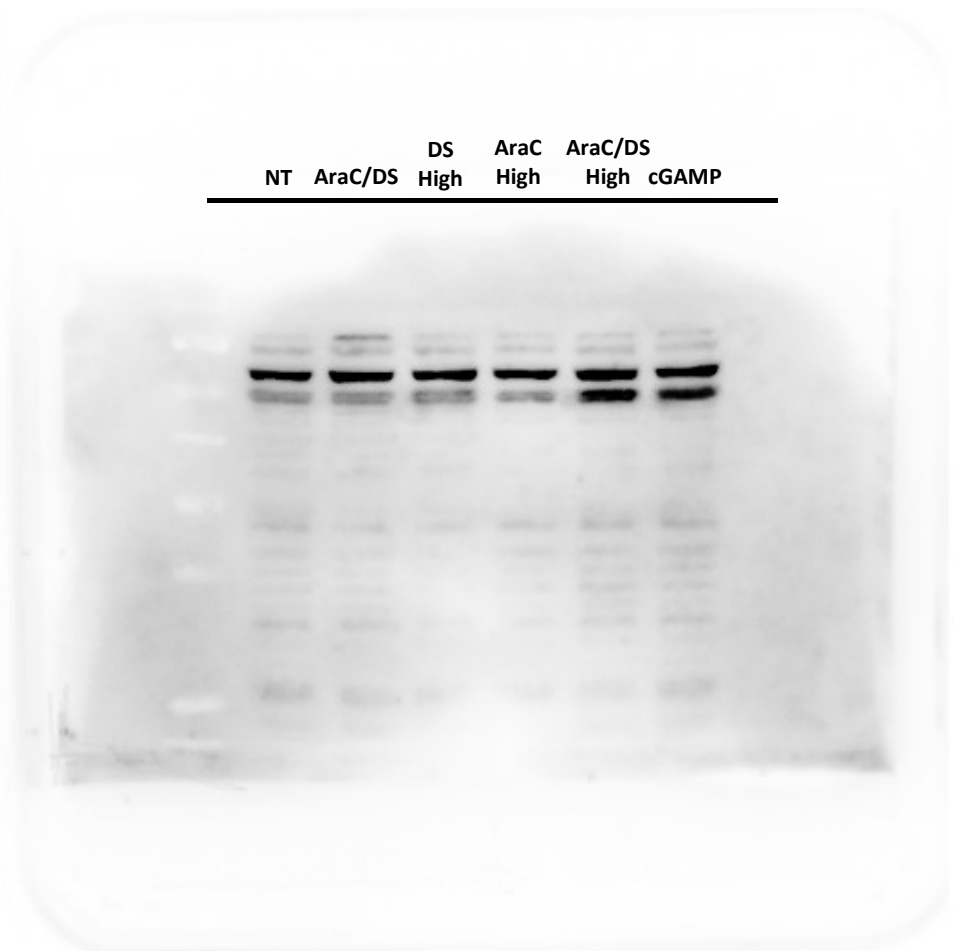

A2780R, 6 hours, P-STING:

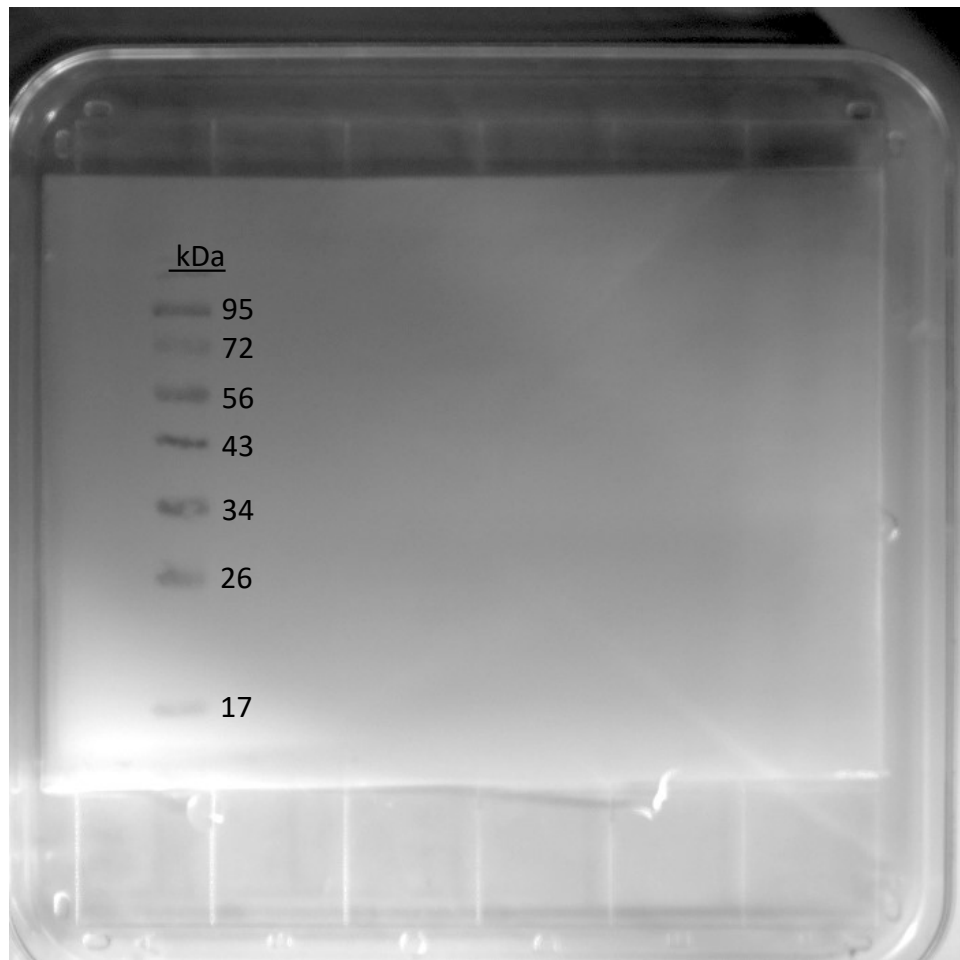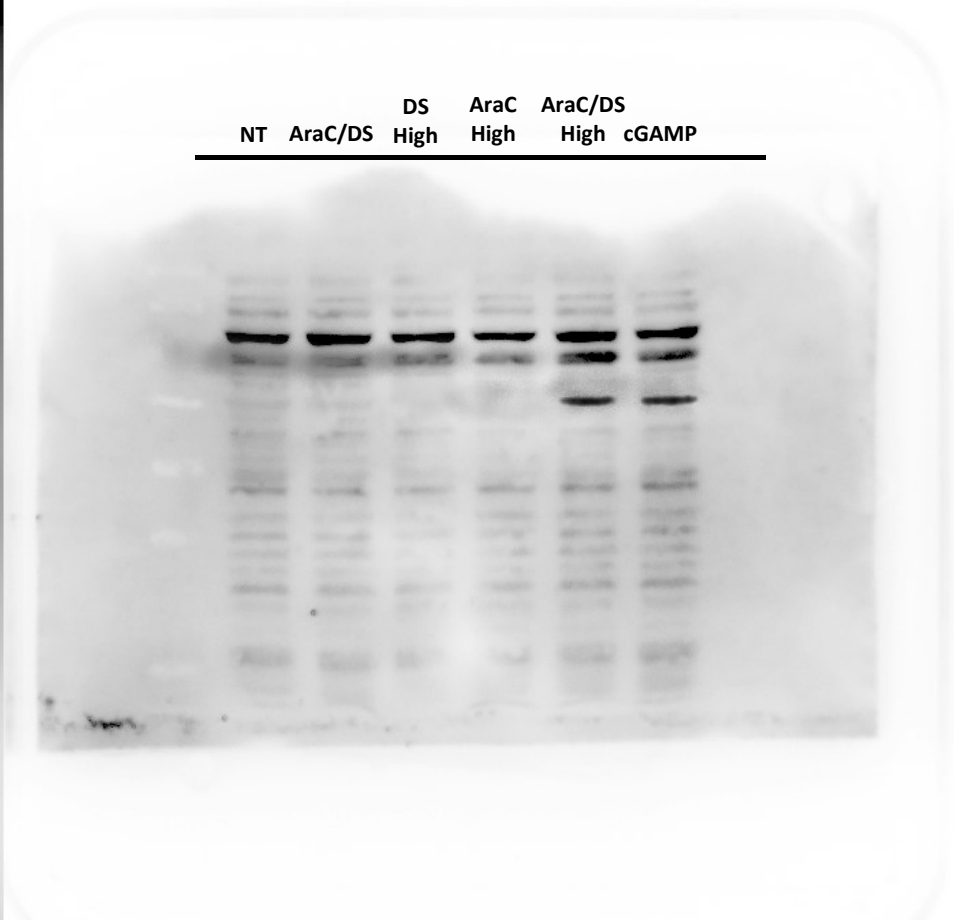

A2780R, 6 hours, GAPDH:

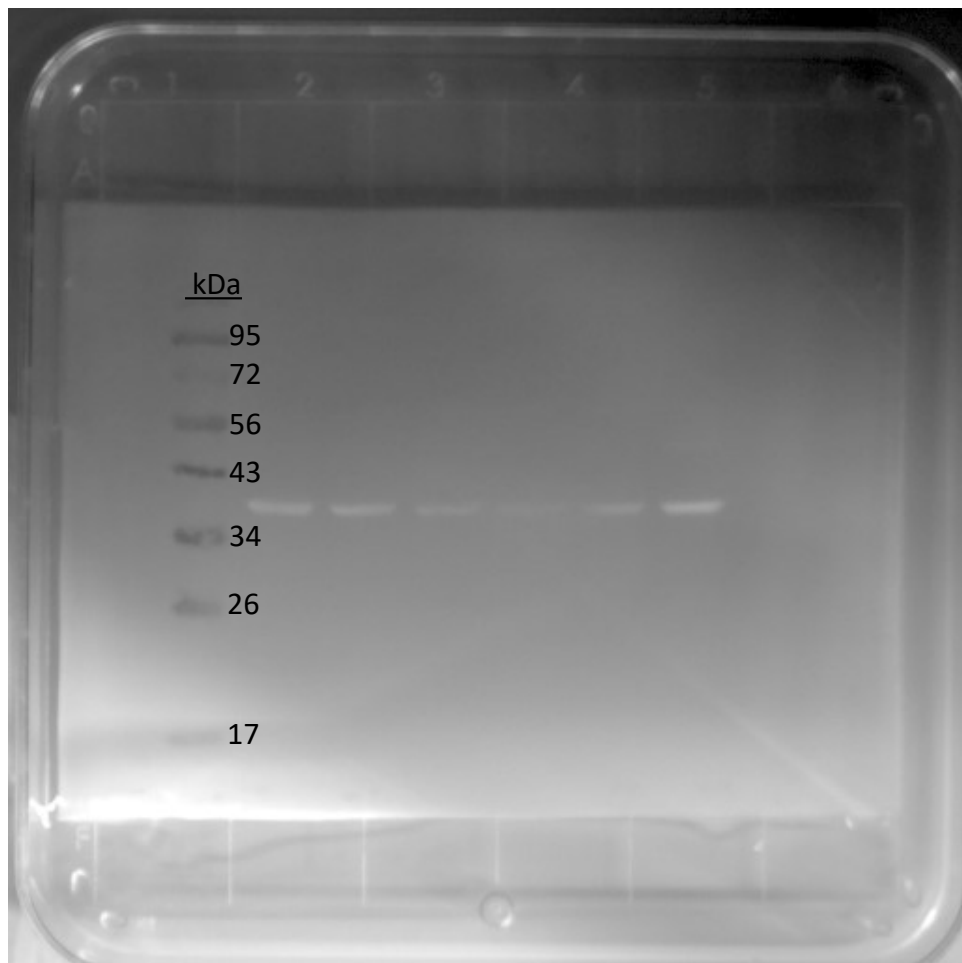

| NT | AraC/DS | DS<br>High | AraC<br>High | AraC/DS<br>High | cGAMP |
|----|---------|------------|--------------|-----------------|-------|
|----|---------|------------|--------------|-----------------|-------|

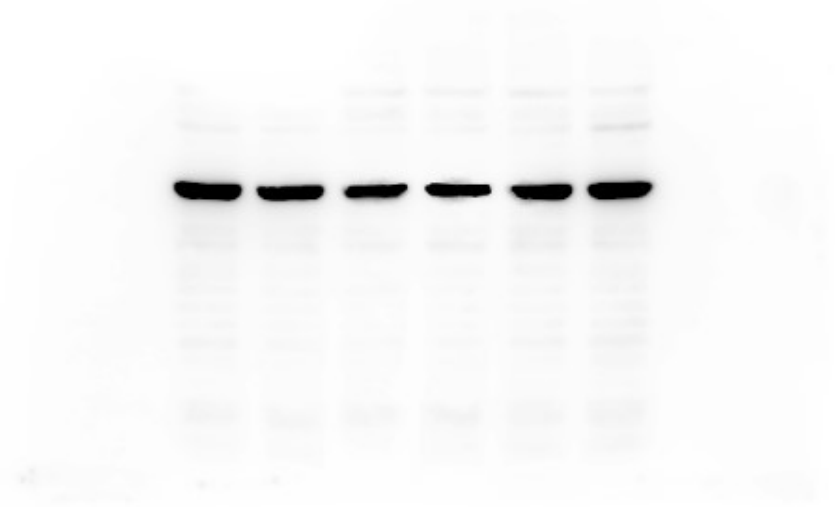

HCT 116, 6 hours, P-TBK1:

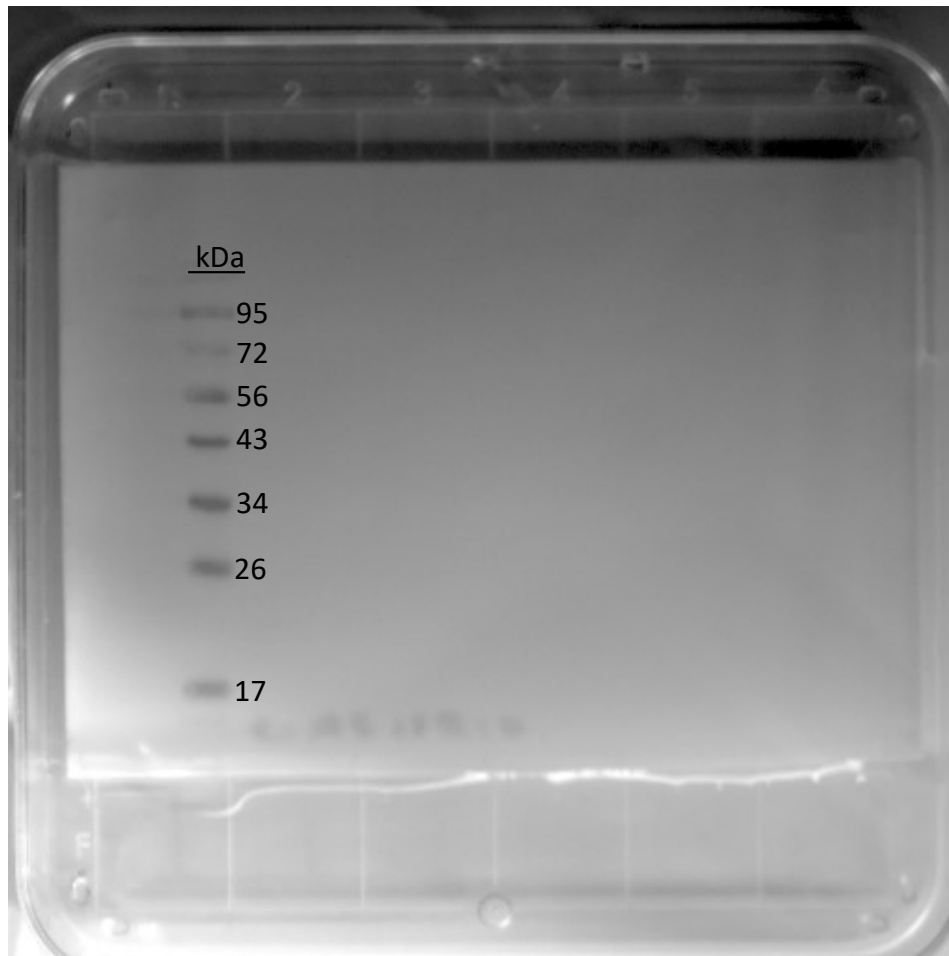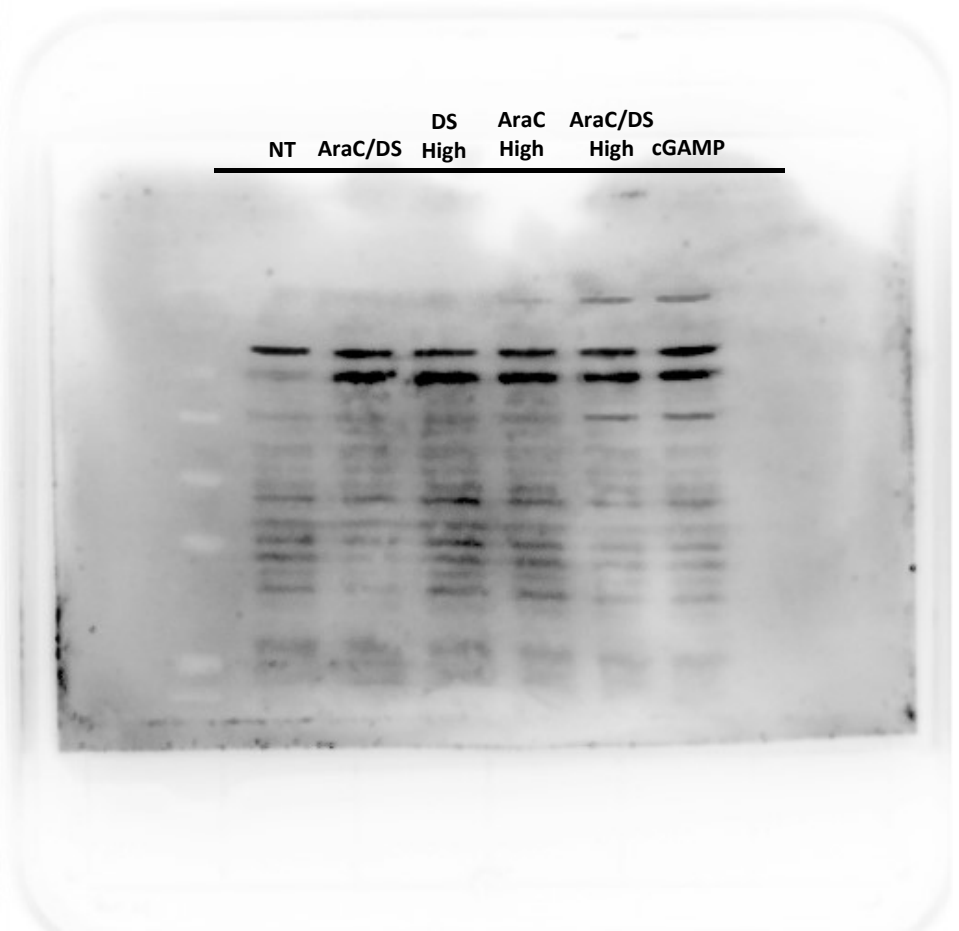

HCT 116, 6 hours, P-IRF3:

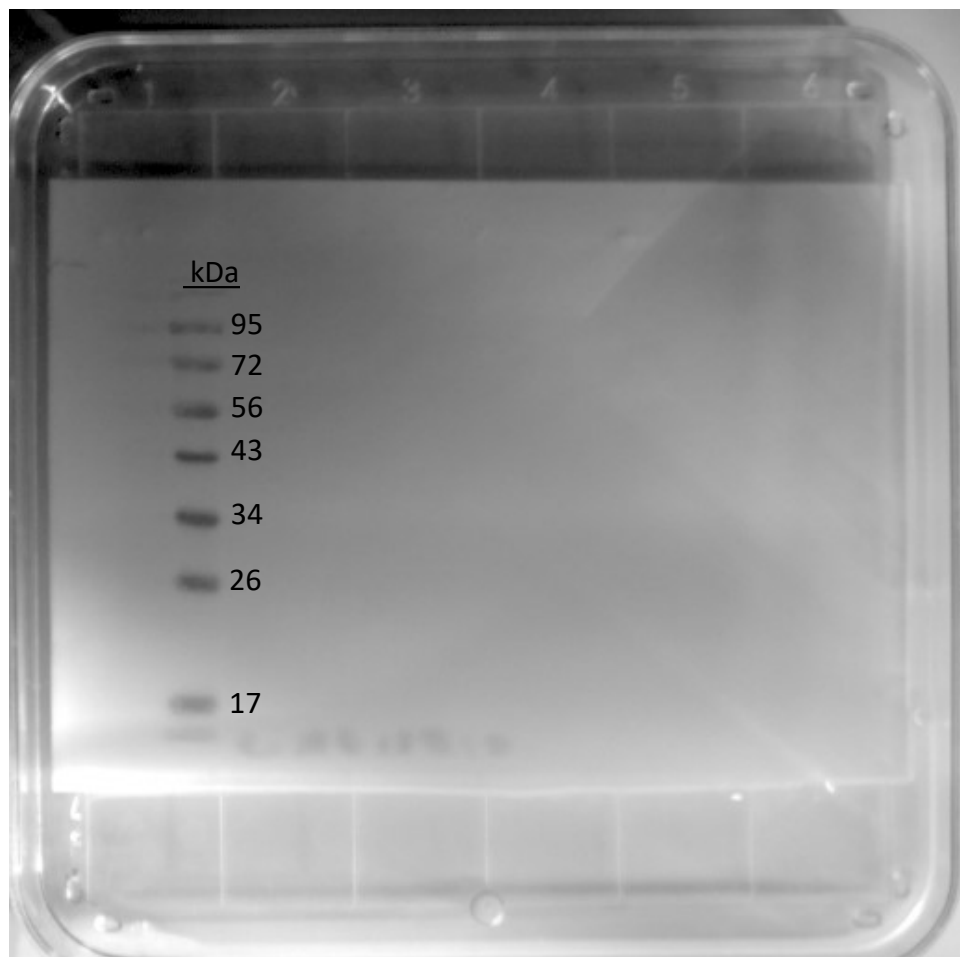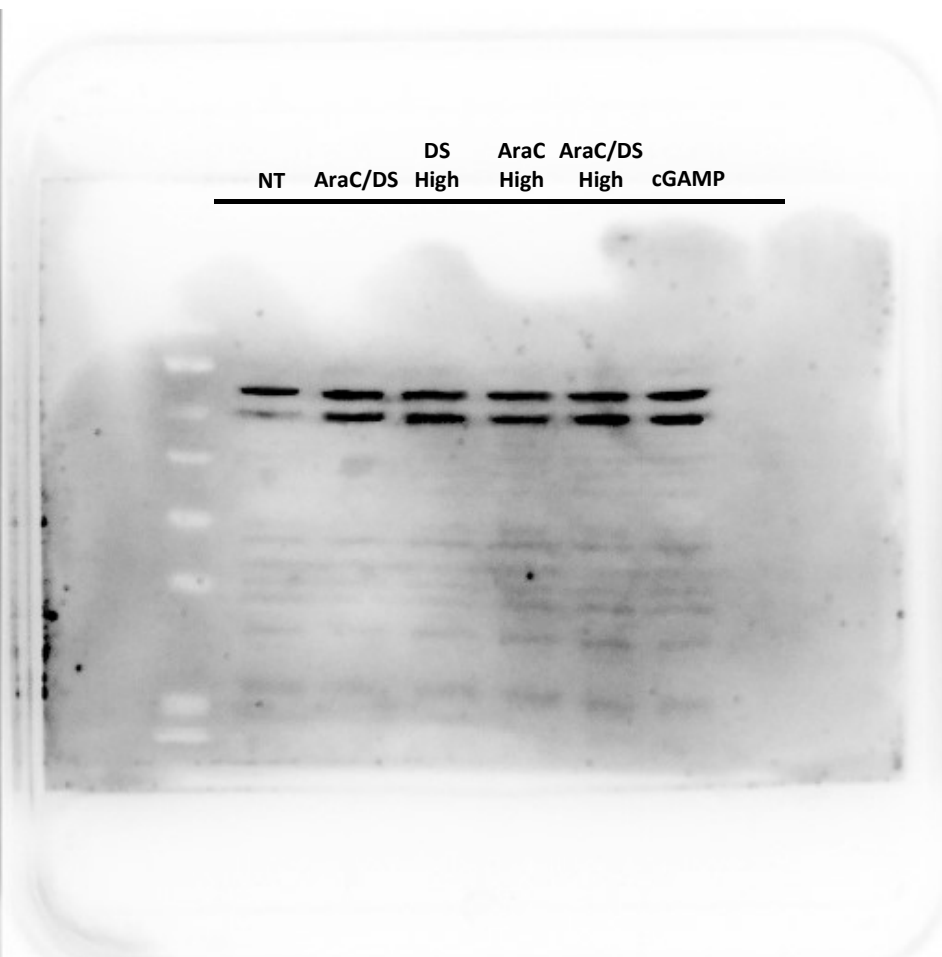

SDS-PAGE gel image showing protein bands across six lanes. Molecular weight markers are indicated on the left at 95, 72, 56, 43, 34, 26, and 17 kDa. Lane 1 contains the marker bands. Lanes 2-6 show various protein bands, with lane 5 showing a prominent band around 34 kDa.

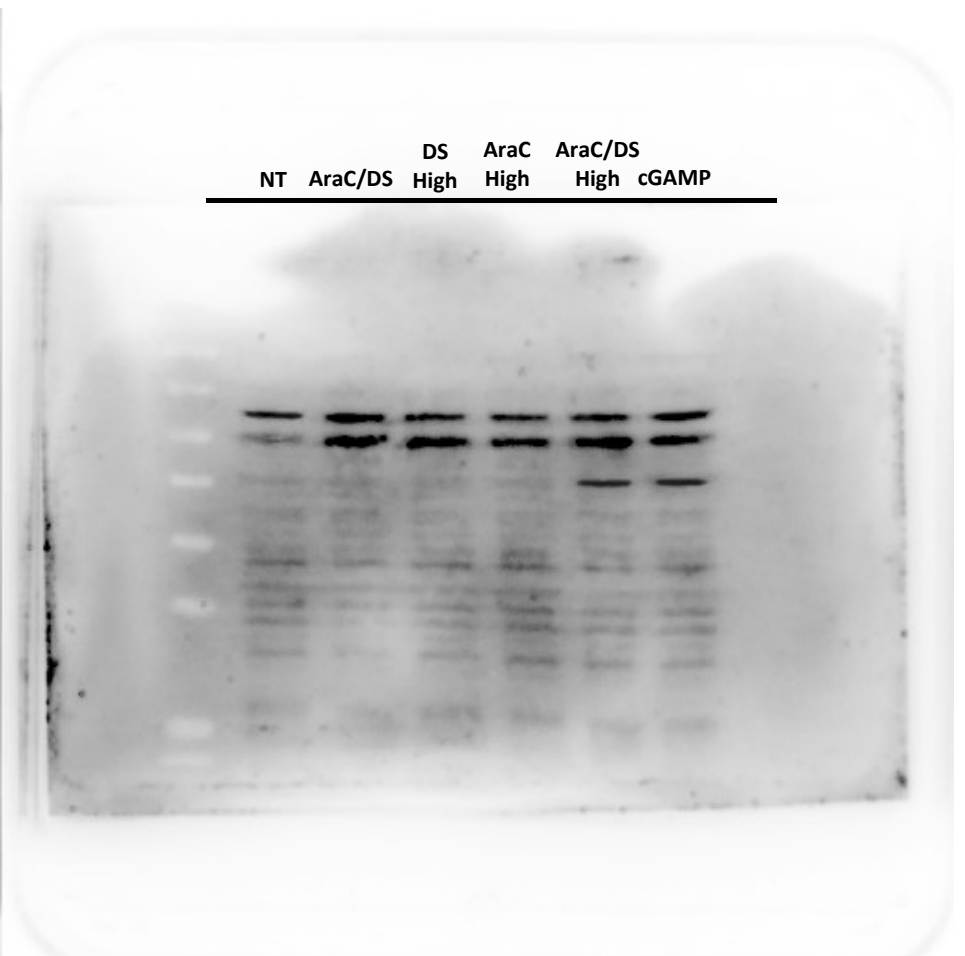

HCT 116, 6 hours, GAPDH:

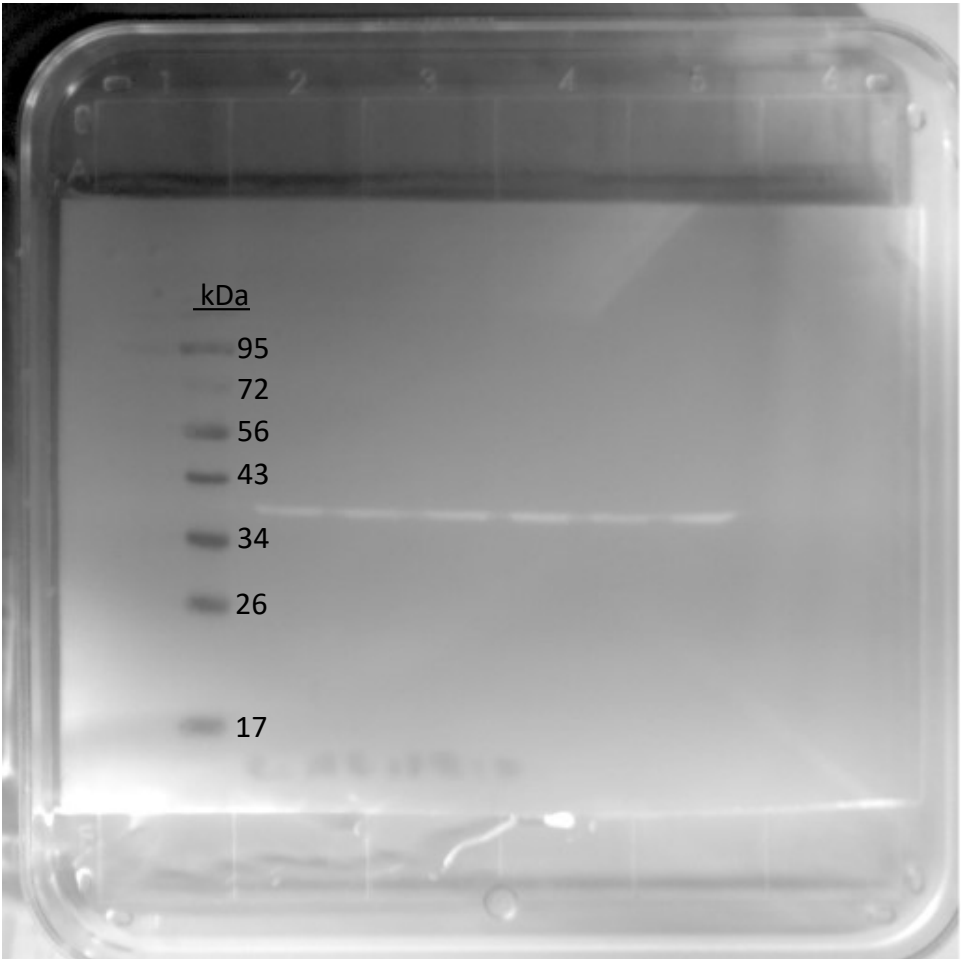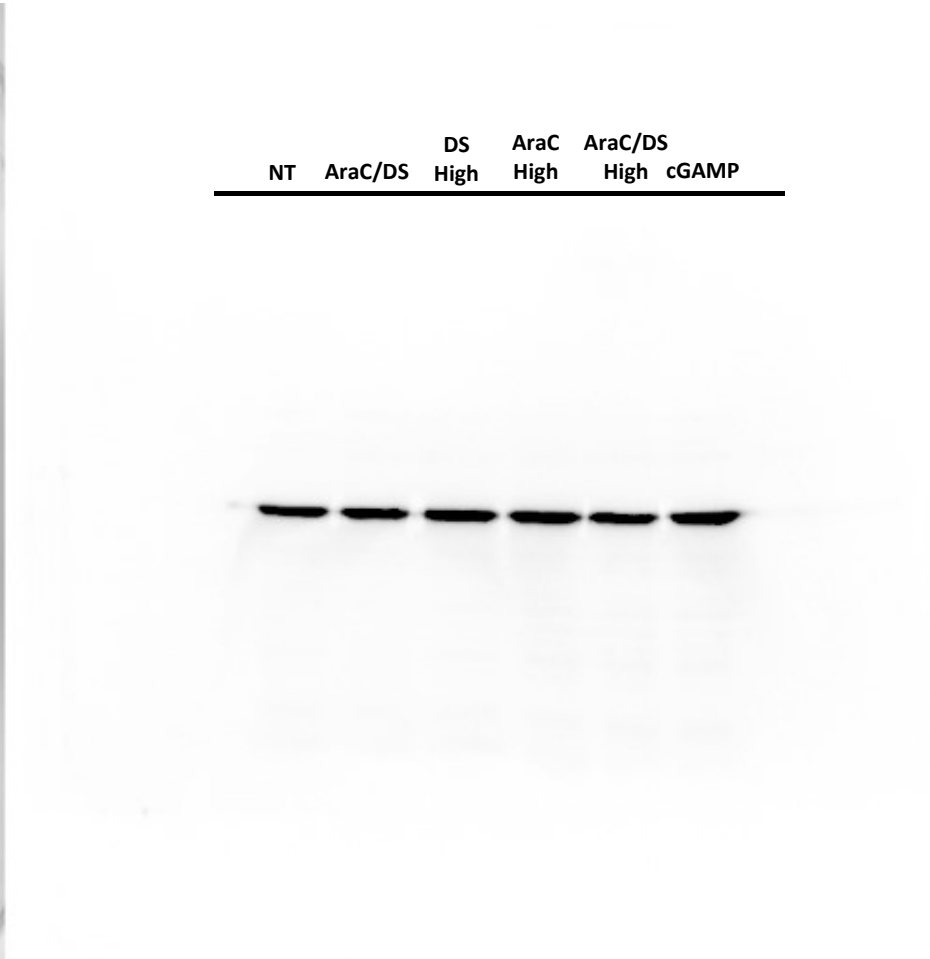

HT-29, 6 hours, P-TBK1:

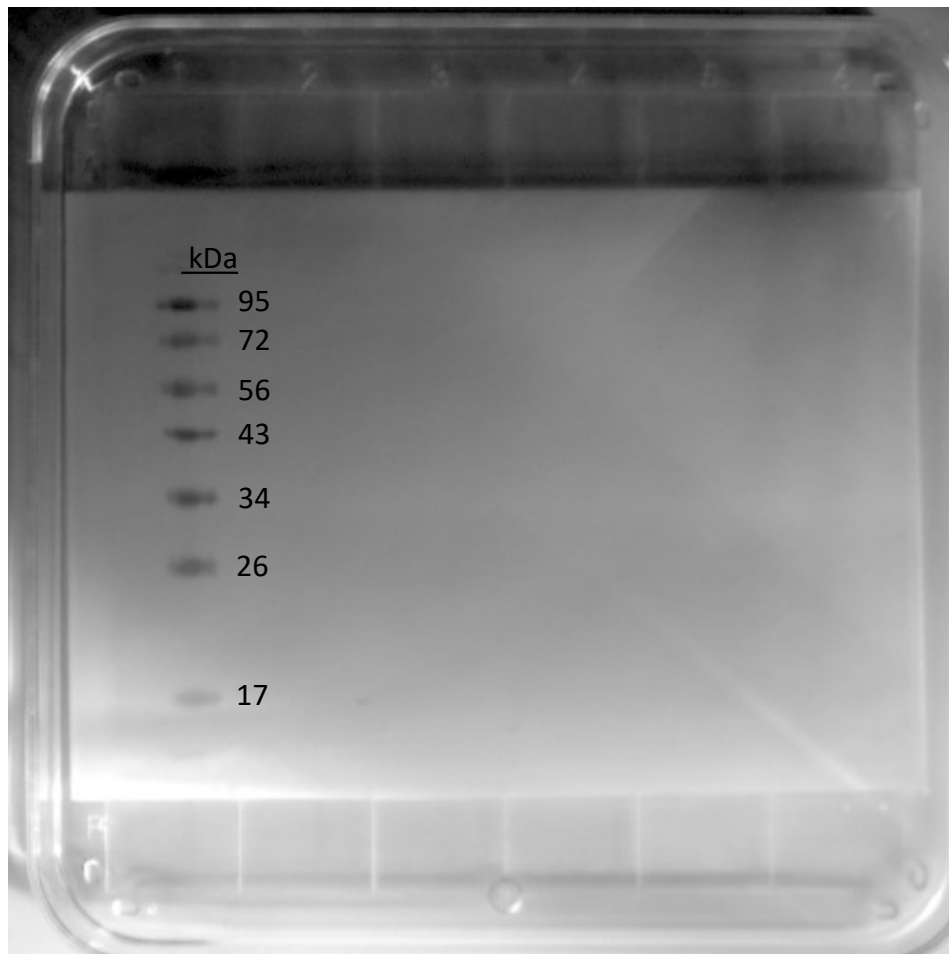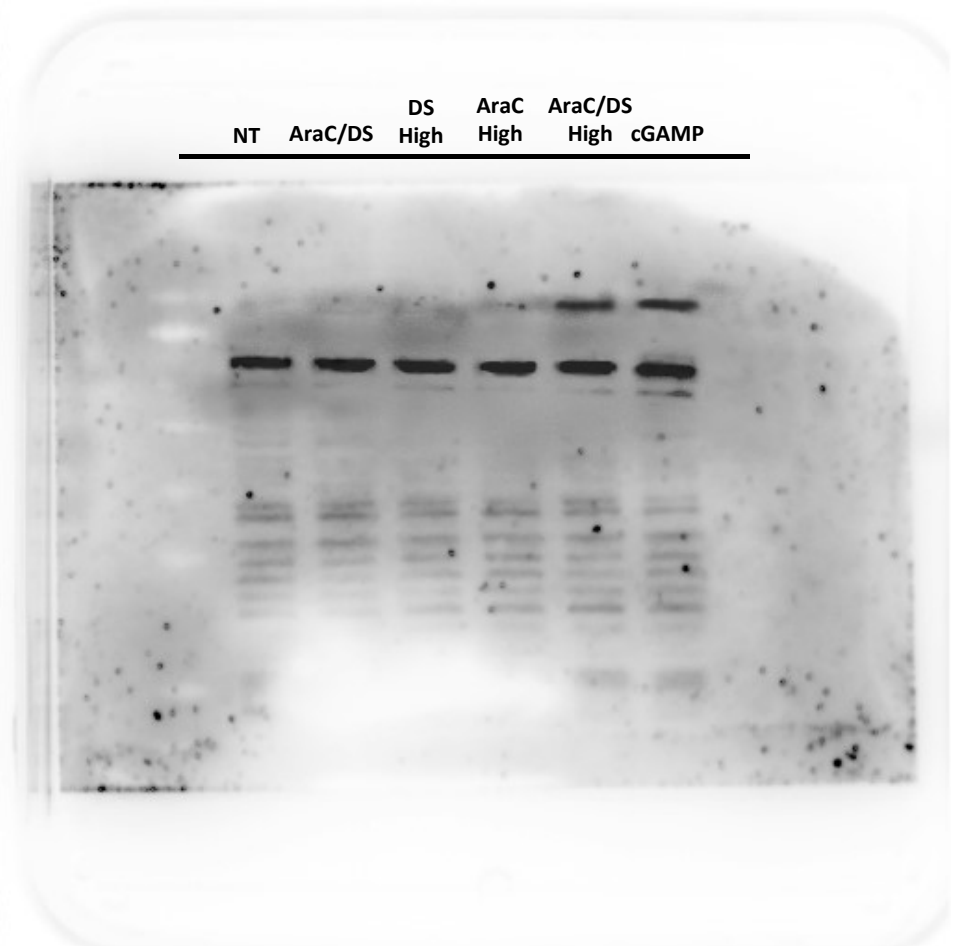

HT-29, 6 hours, P-IRF3:

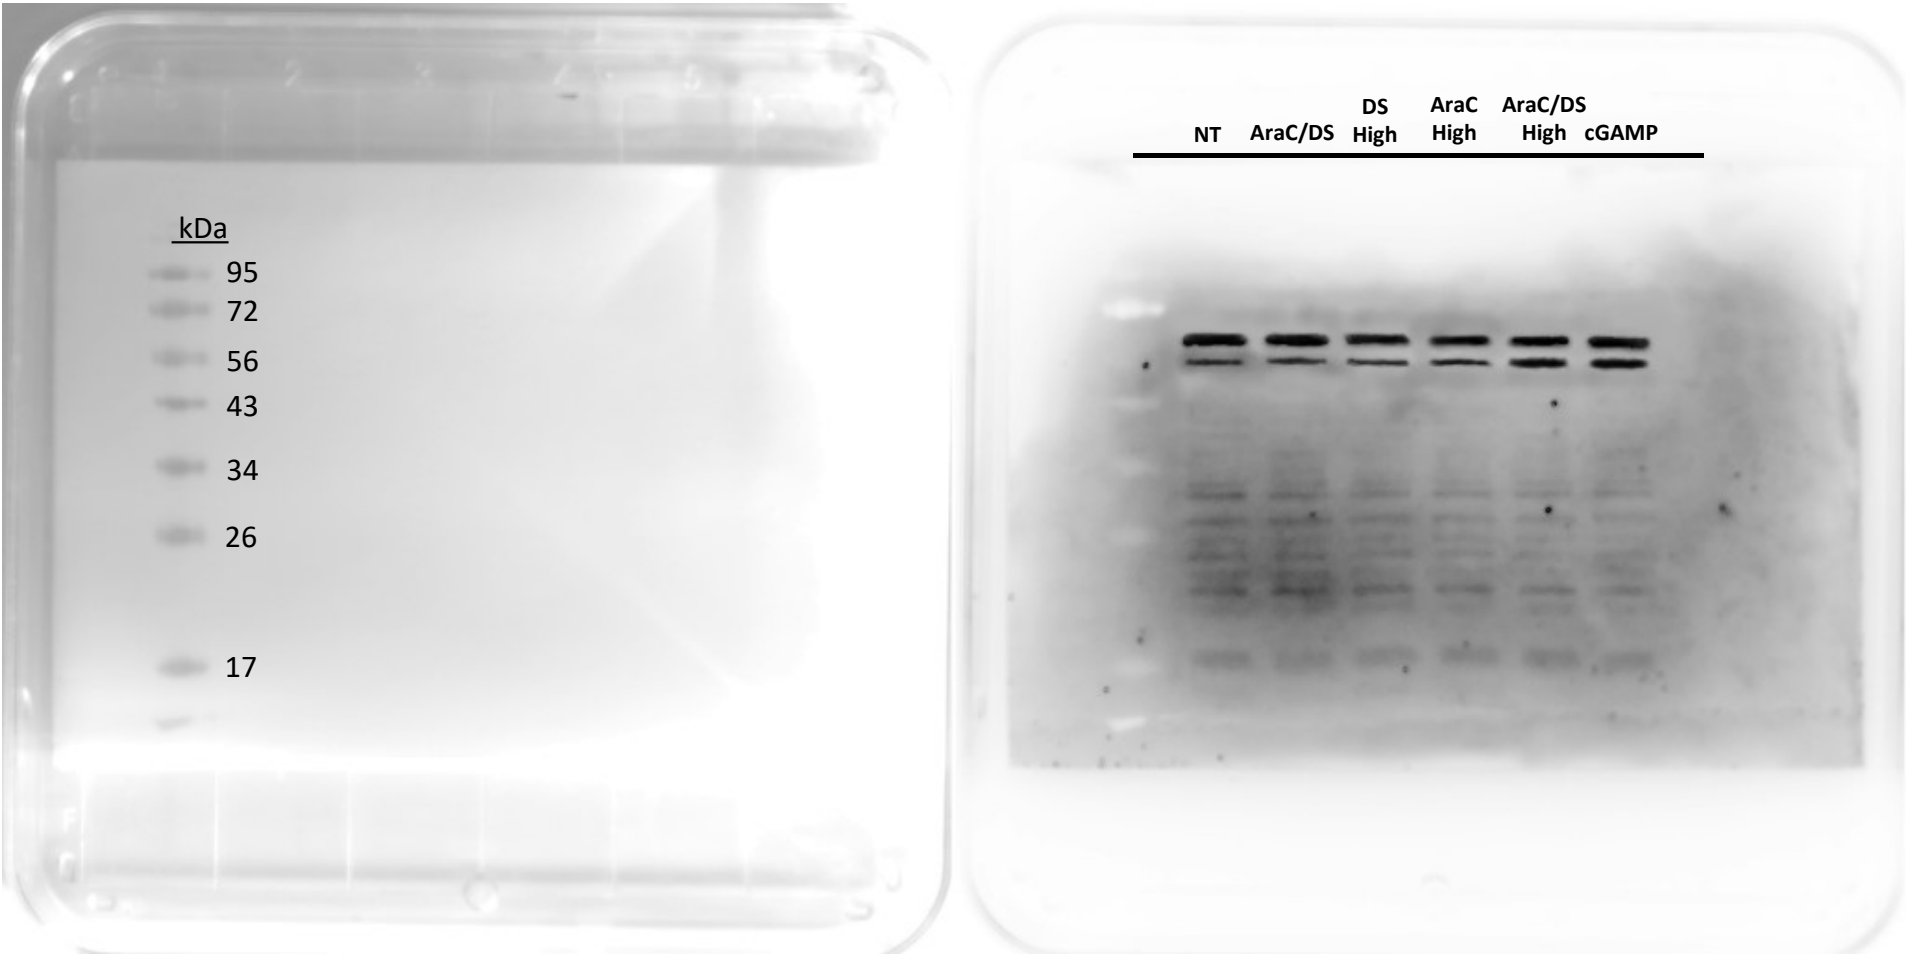

HT-29, 6 hours, P-STING:

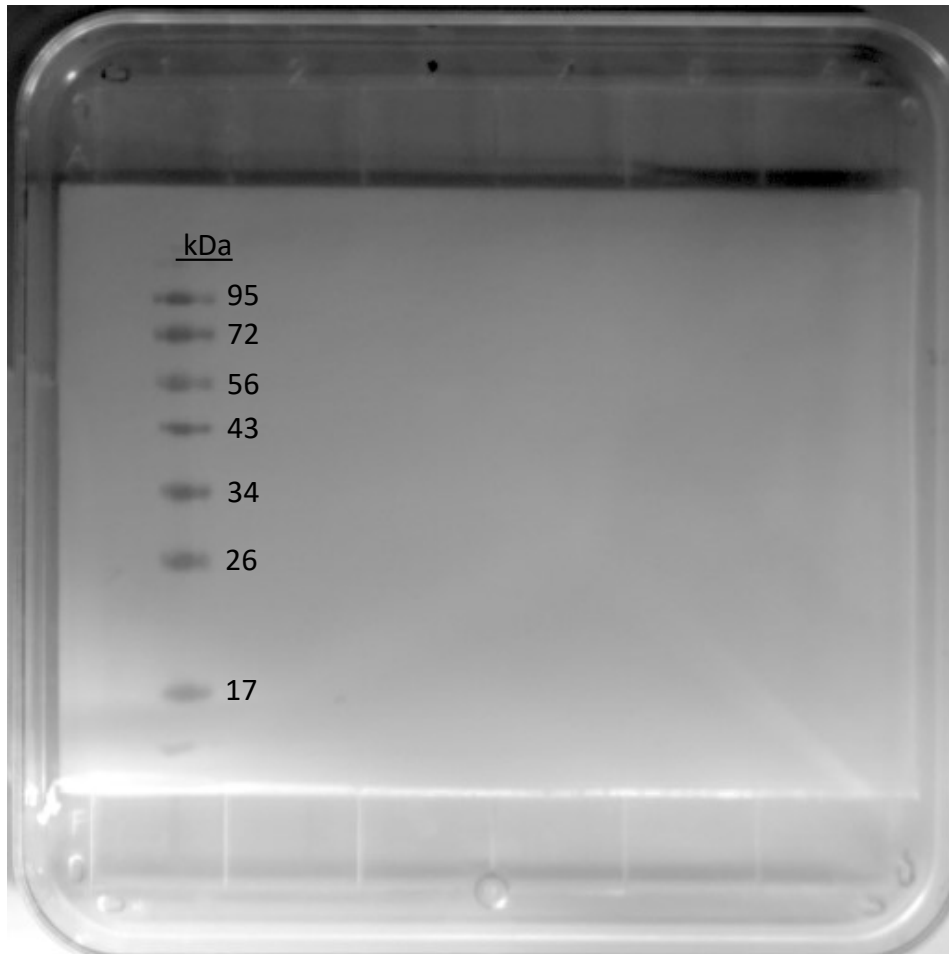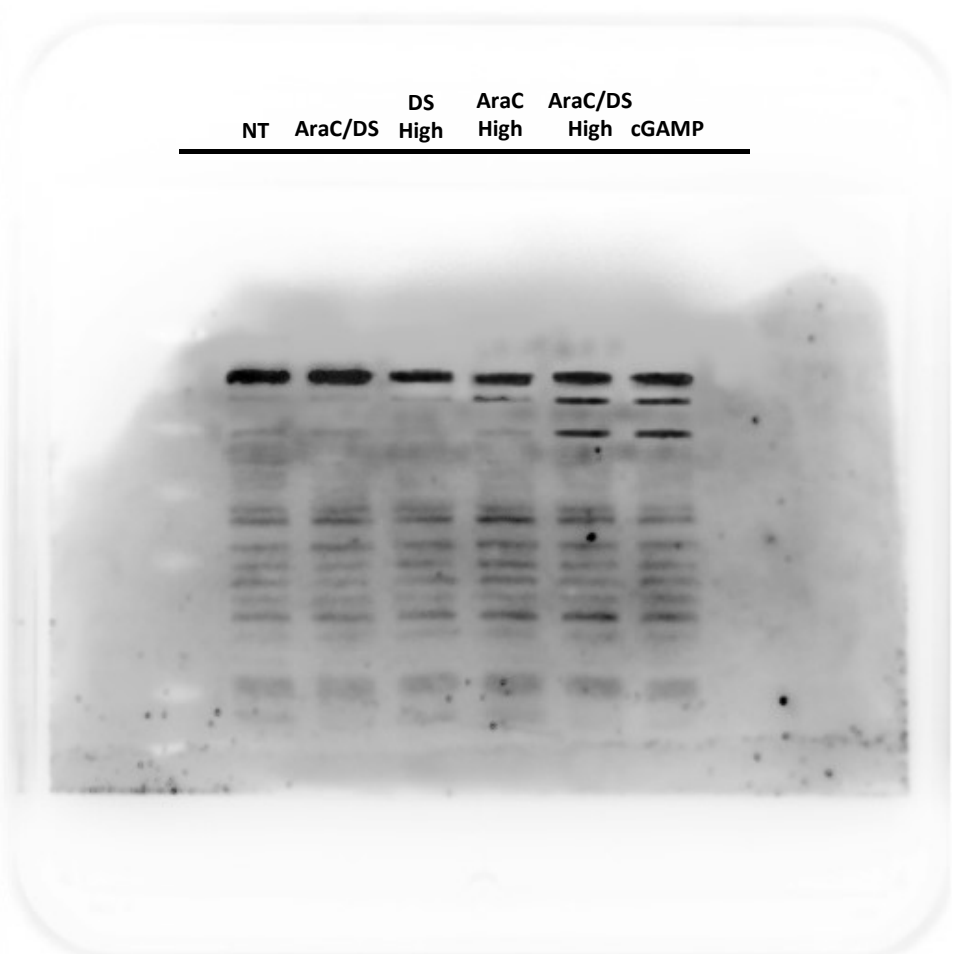

HT-29, 6 hours, GAPDH:

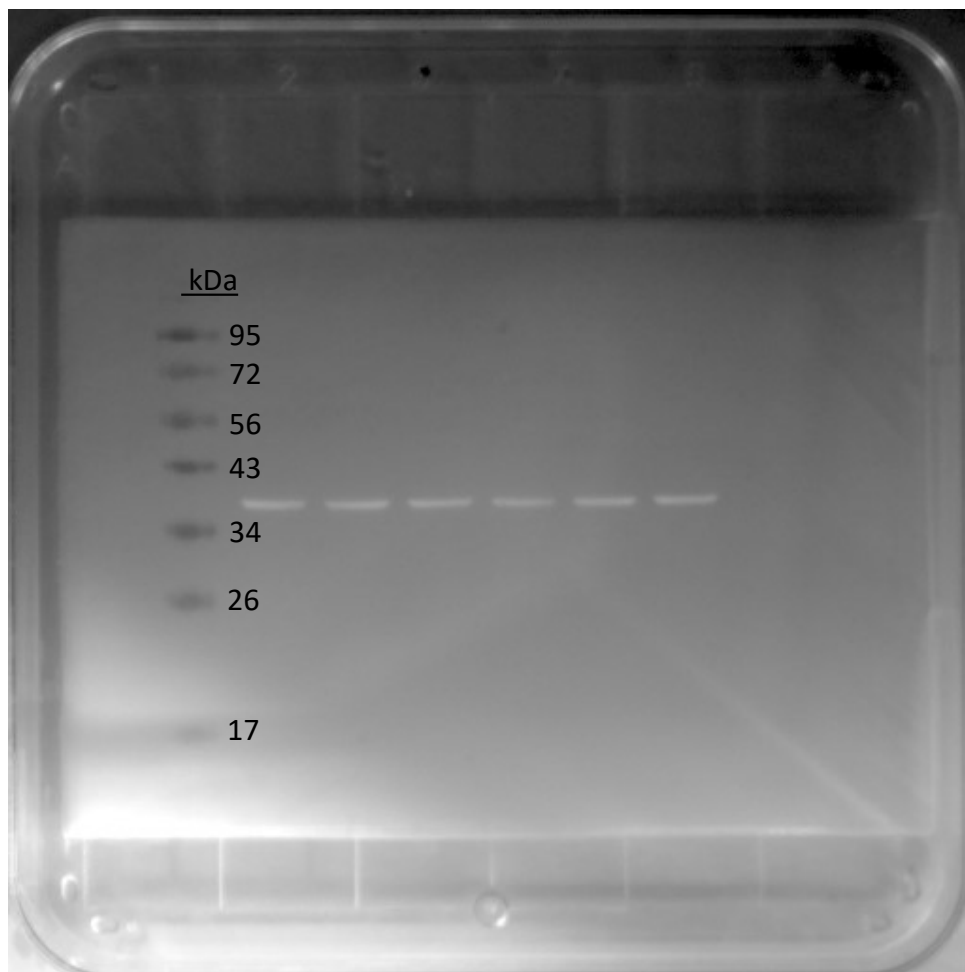

| NT | AraC/DS | DS<br>High | AraC<br>High | AraC/DS<br>High | cGAMP |
|----|---------|------------|--------------|-----------------|-------|
|----|---------|------------|--------------|-----------------|-------|

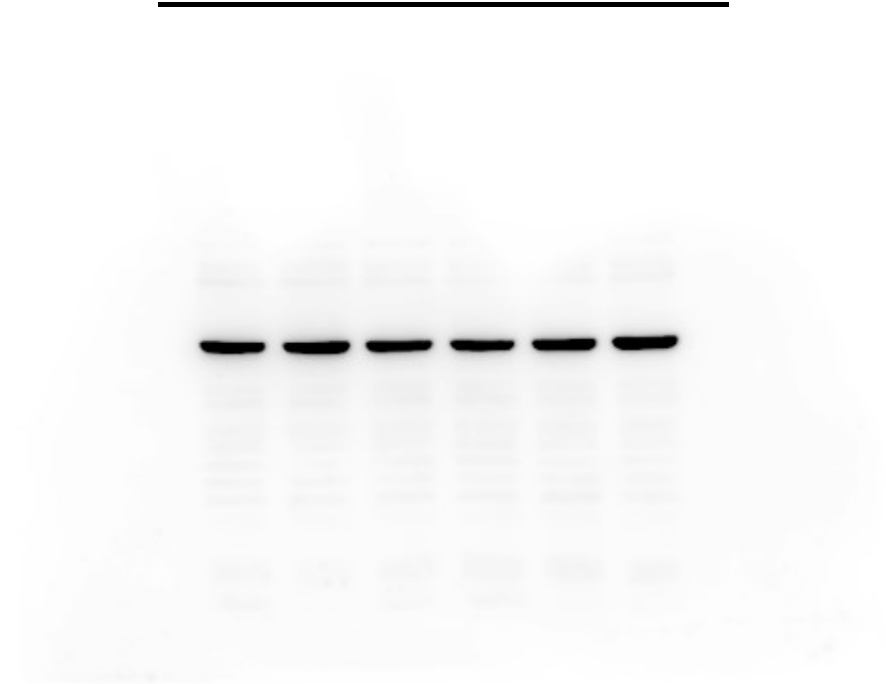

# THP1-Macrophage, 6 hours, P-TBK1:

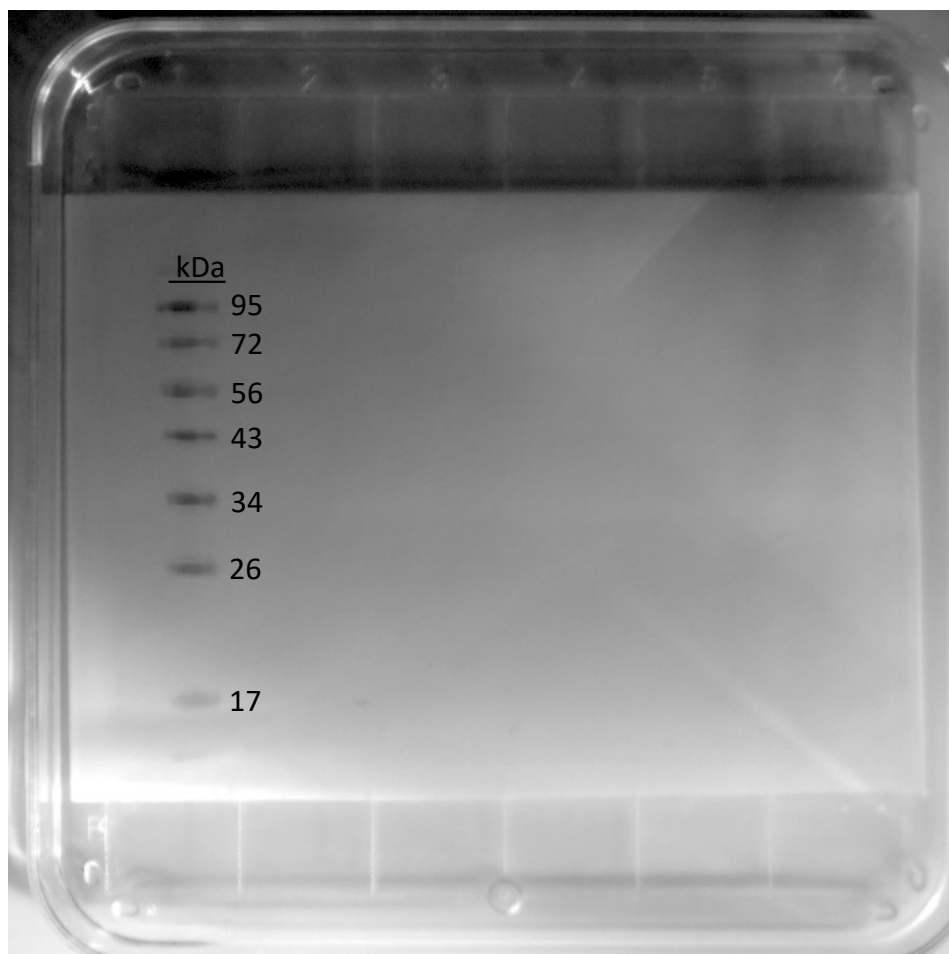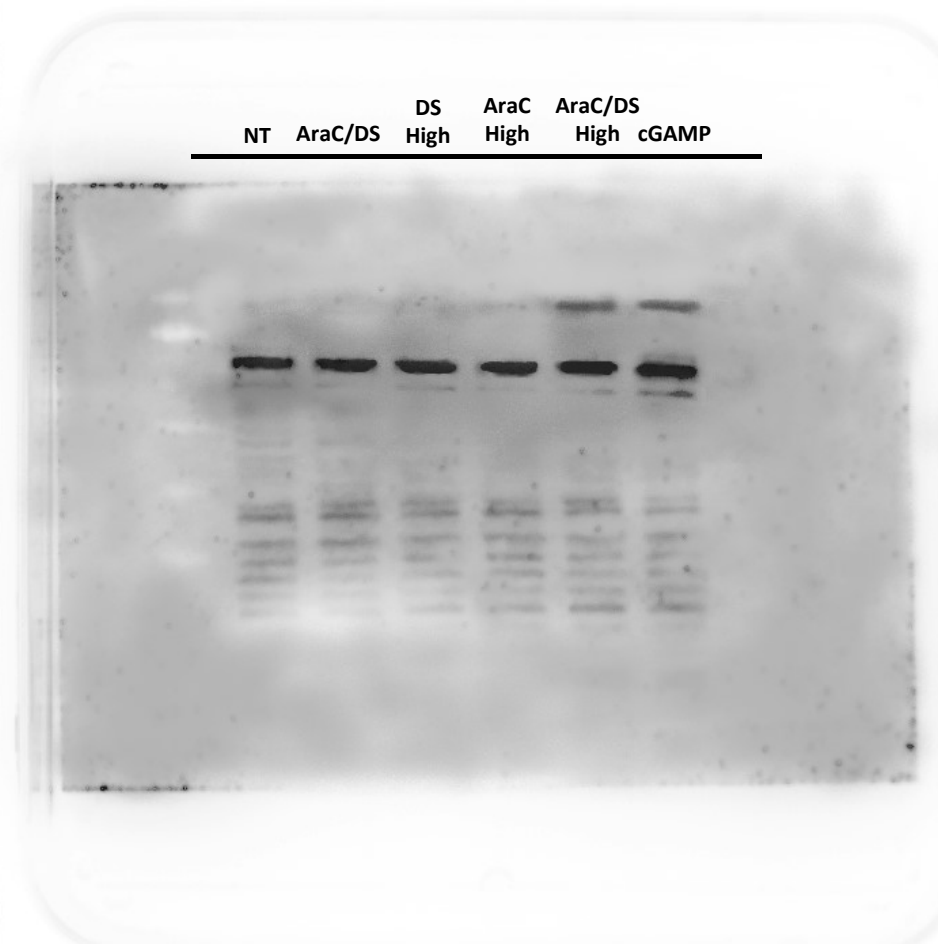

# THP1-Macrophage, 6 hours, P-IRF3:

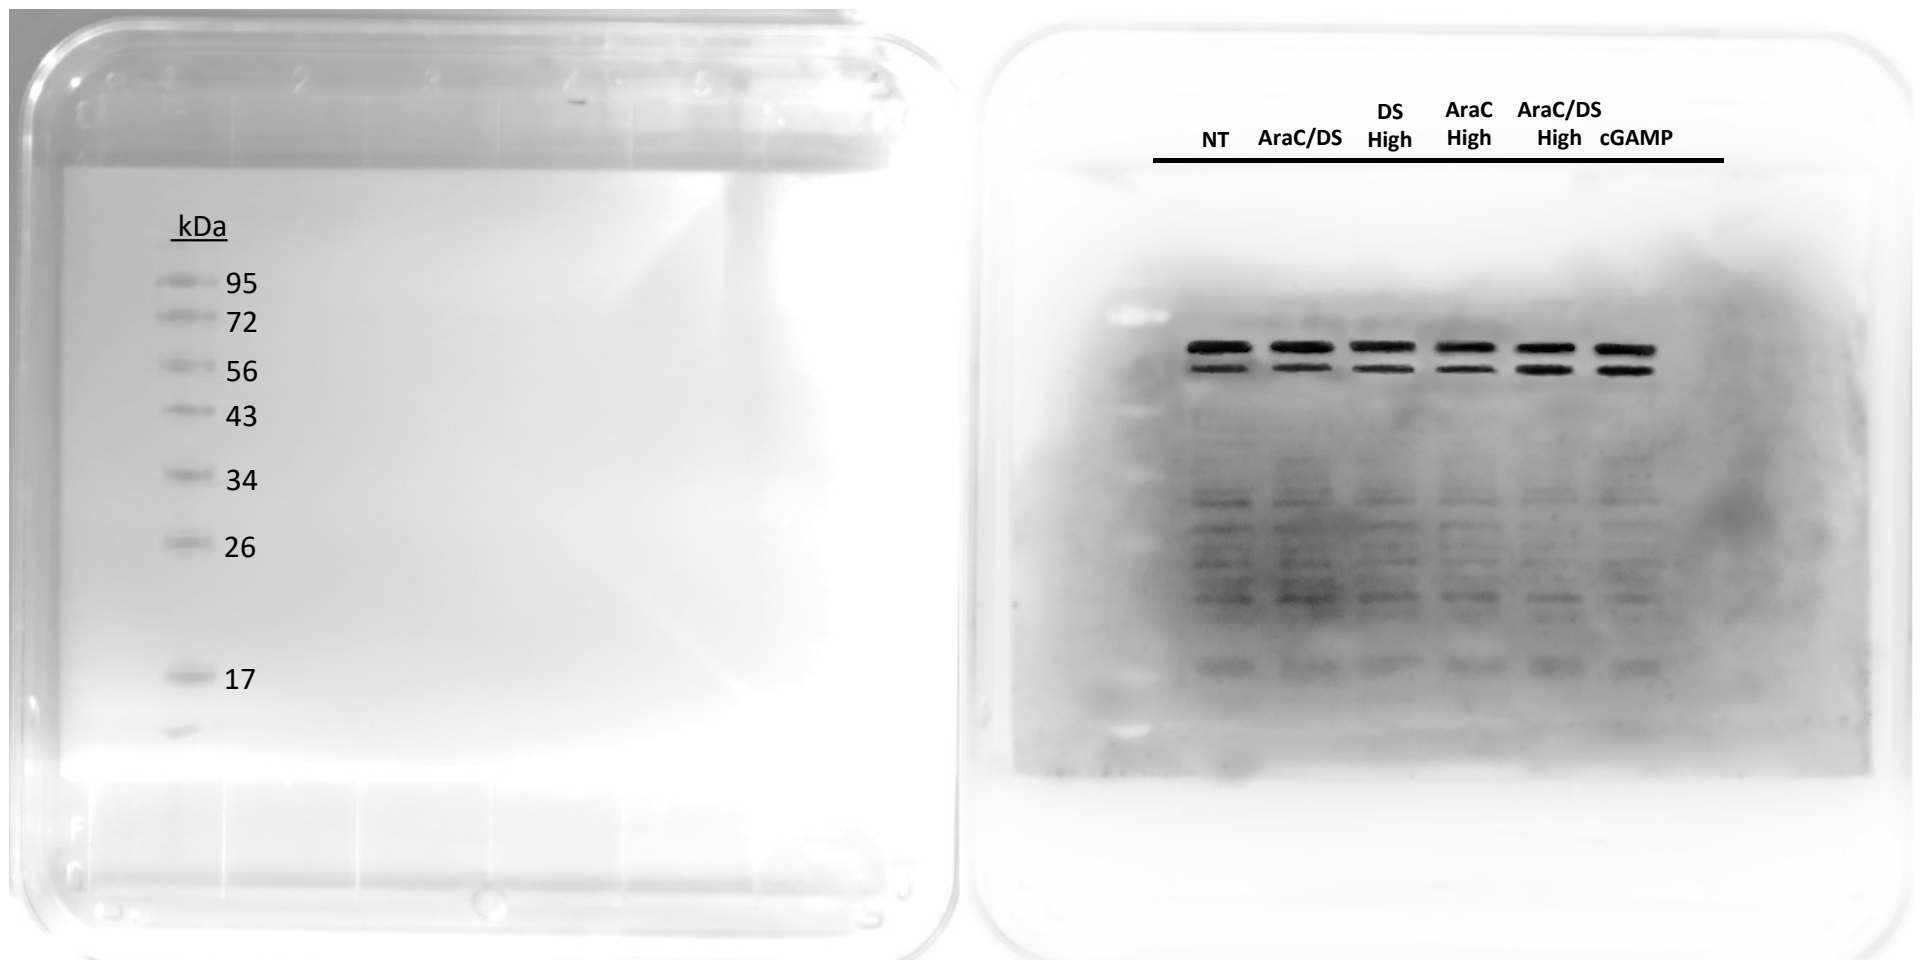

# THP1-Macrophage, 6 hours, P-STING:

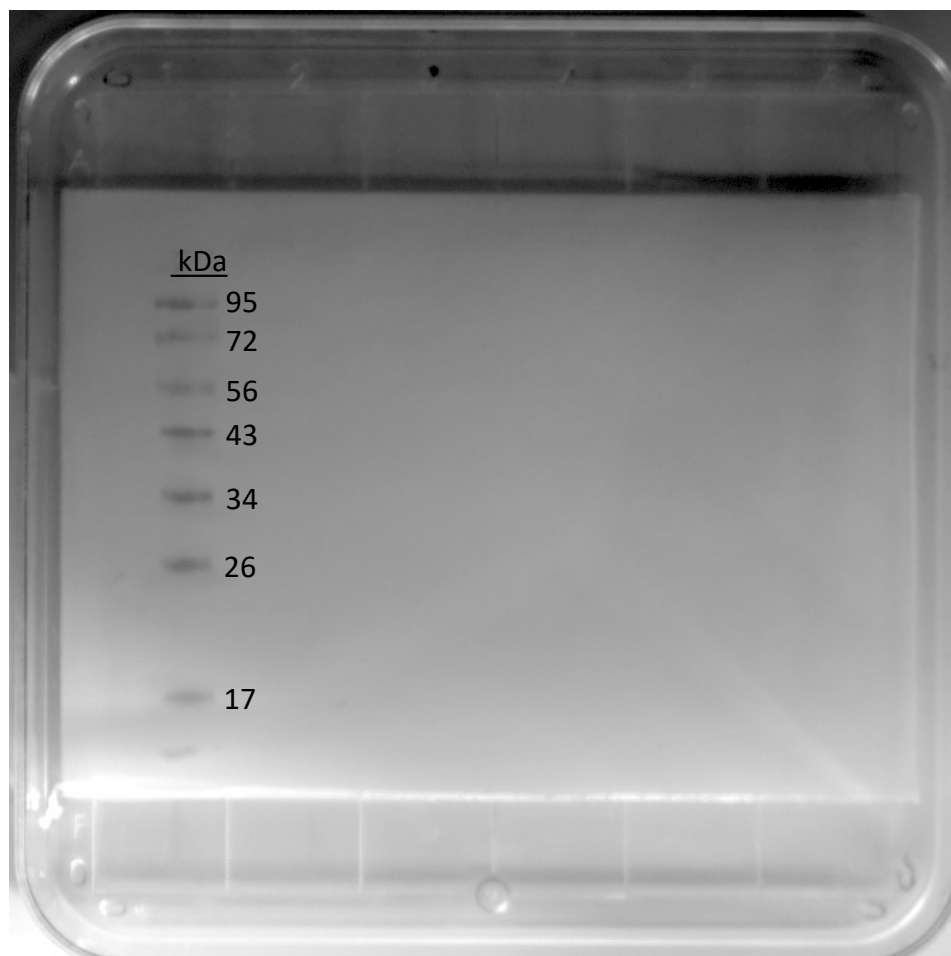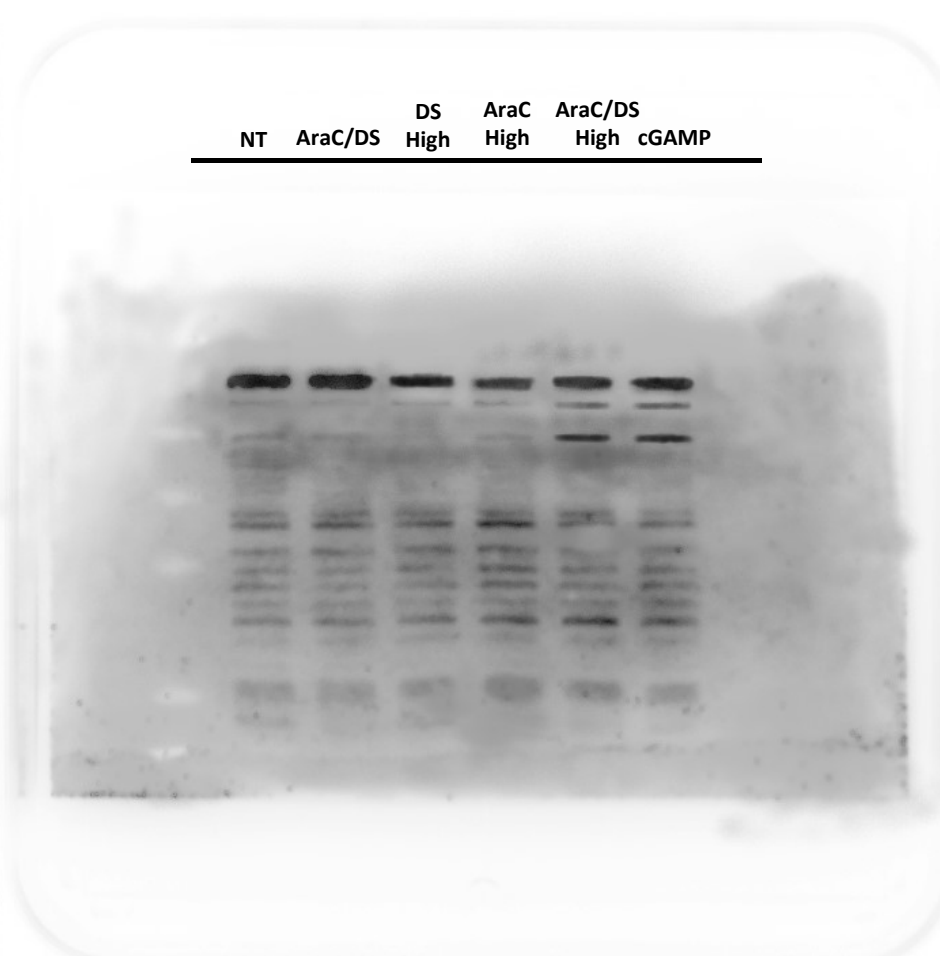

# THP1-Macrophage, 6 hours, GAPDH:

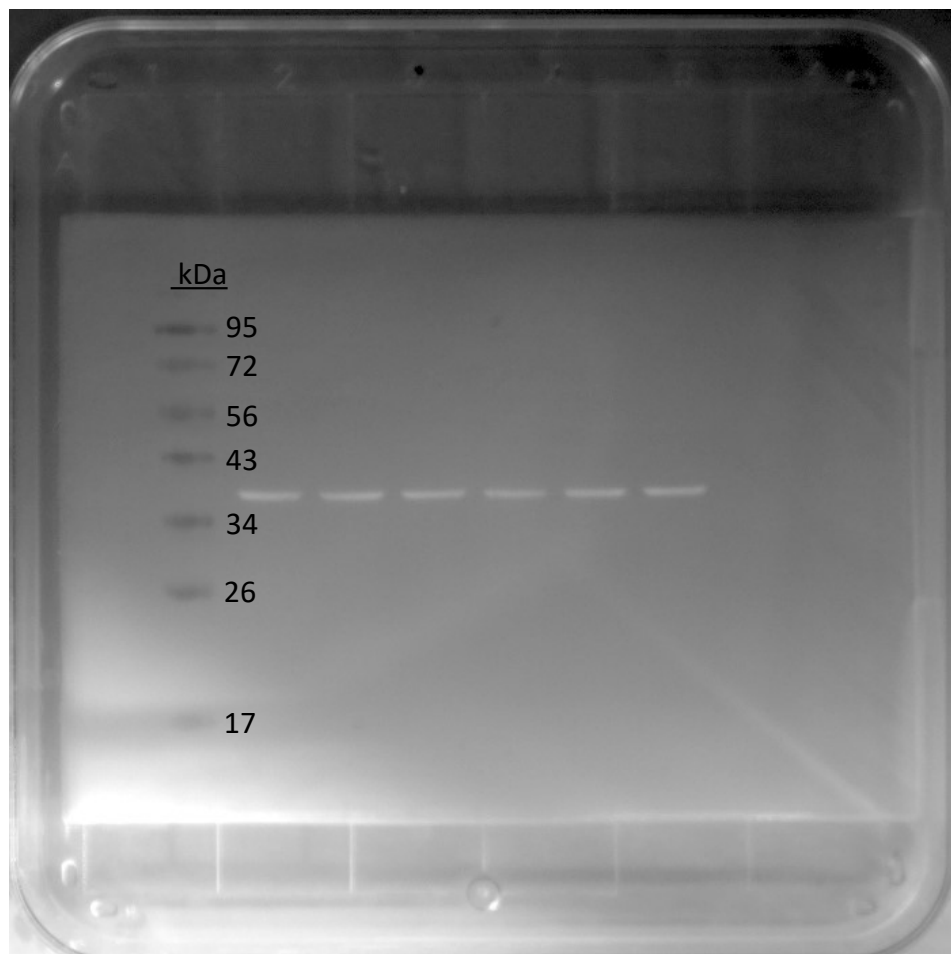

| NT | AraC/DS | DS<br>High | AraC<br>High | AraC/DS<br>High | cGAMP |
|----|---------|------------|--------------|-----------------|-------|
|----|---------|------------|--------------|-----------------|-------|

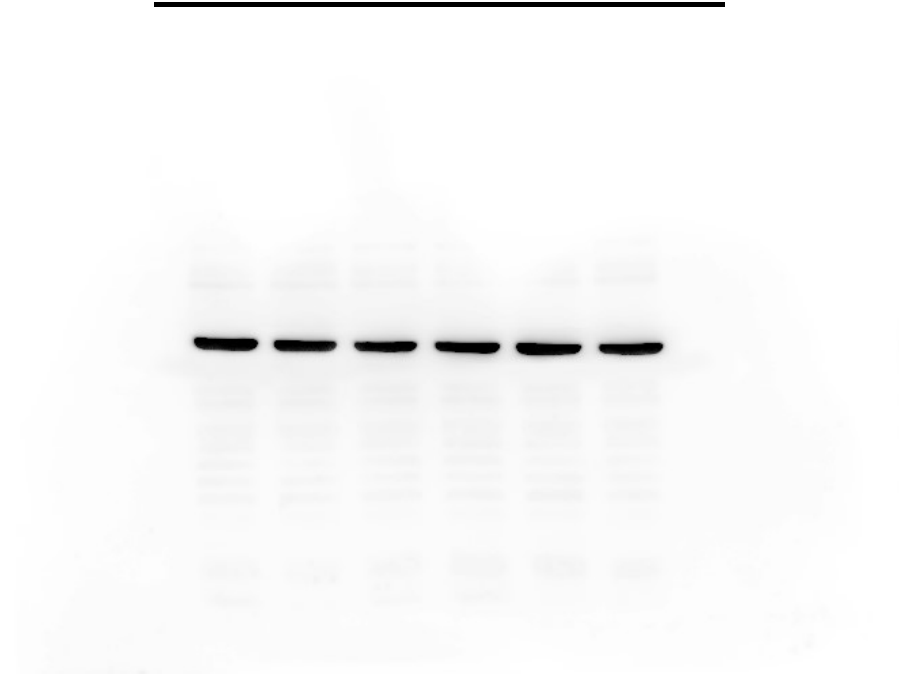

PBMC, 6 hours, P-TBK1:

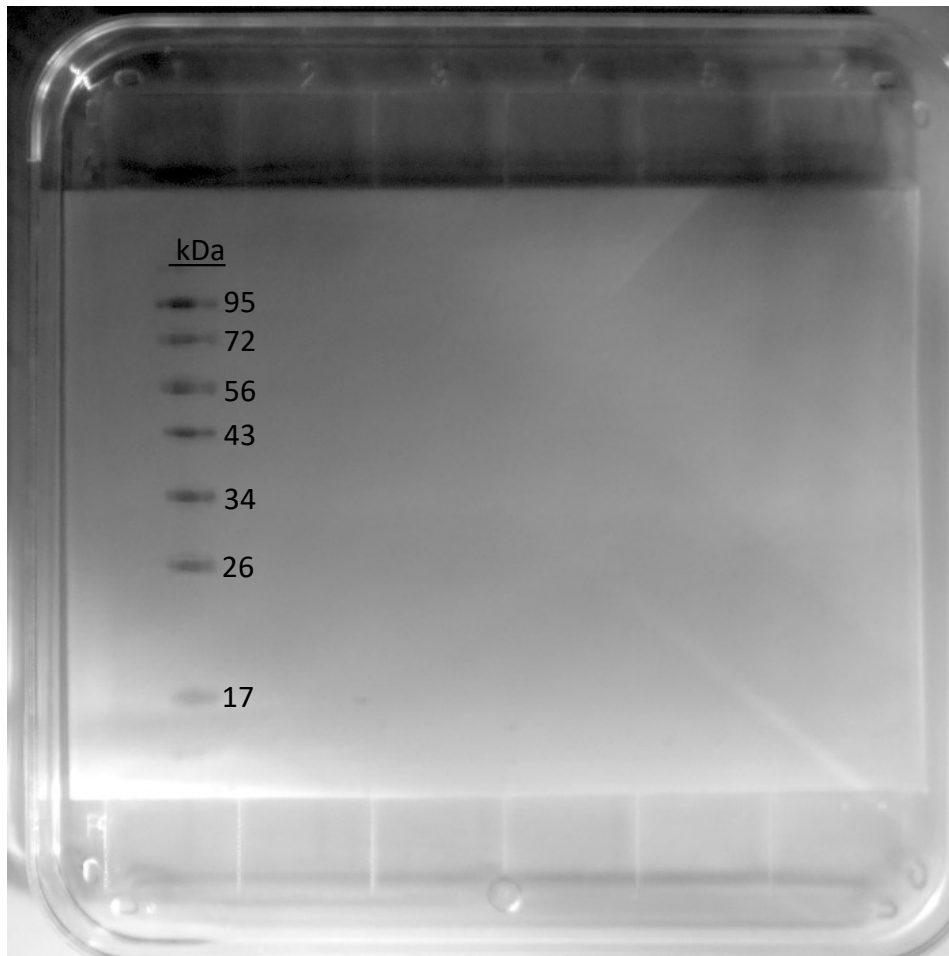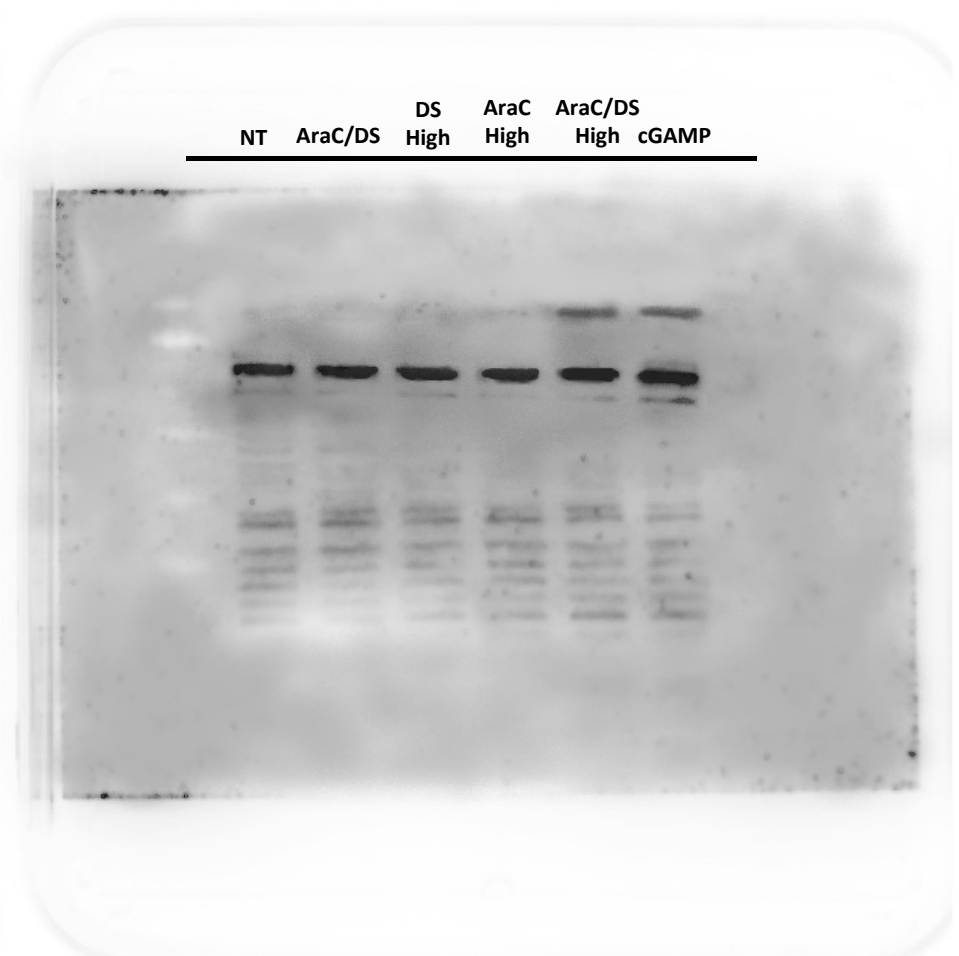

PBMC, 6 hours, P-IRF3:

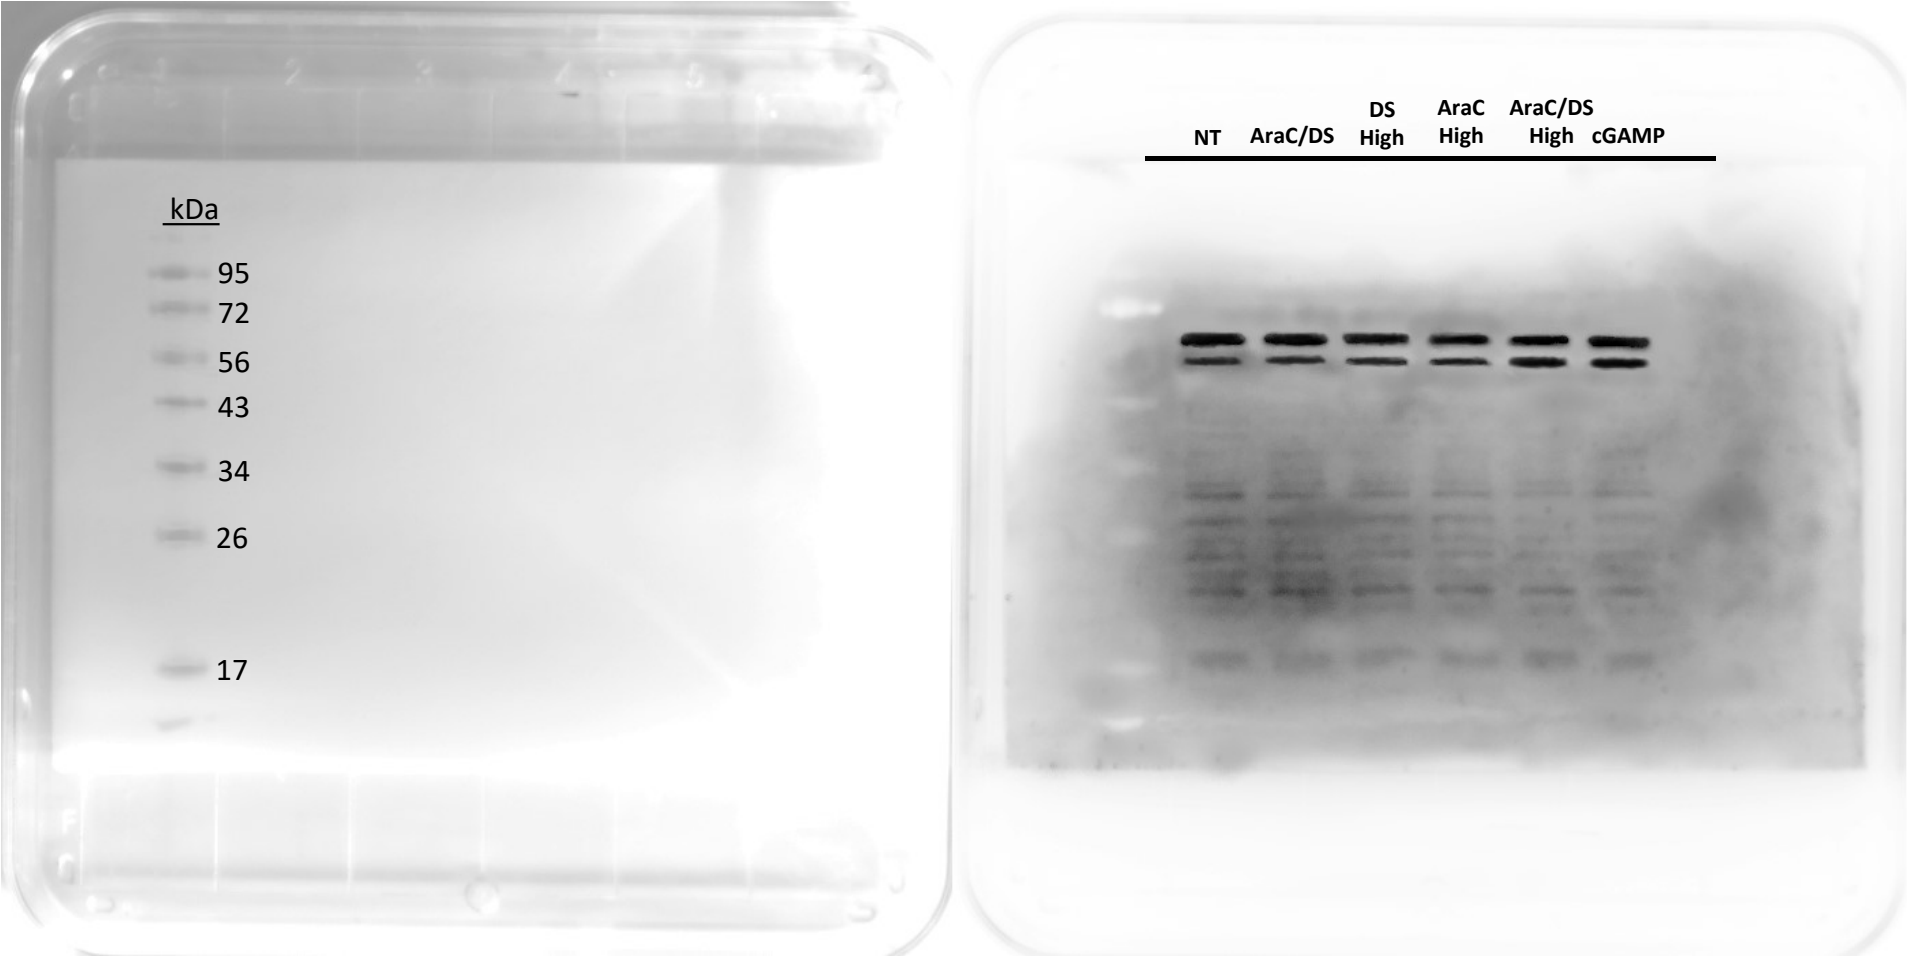

PBMC, 6 hours, P-STING:

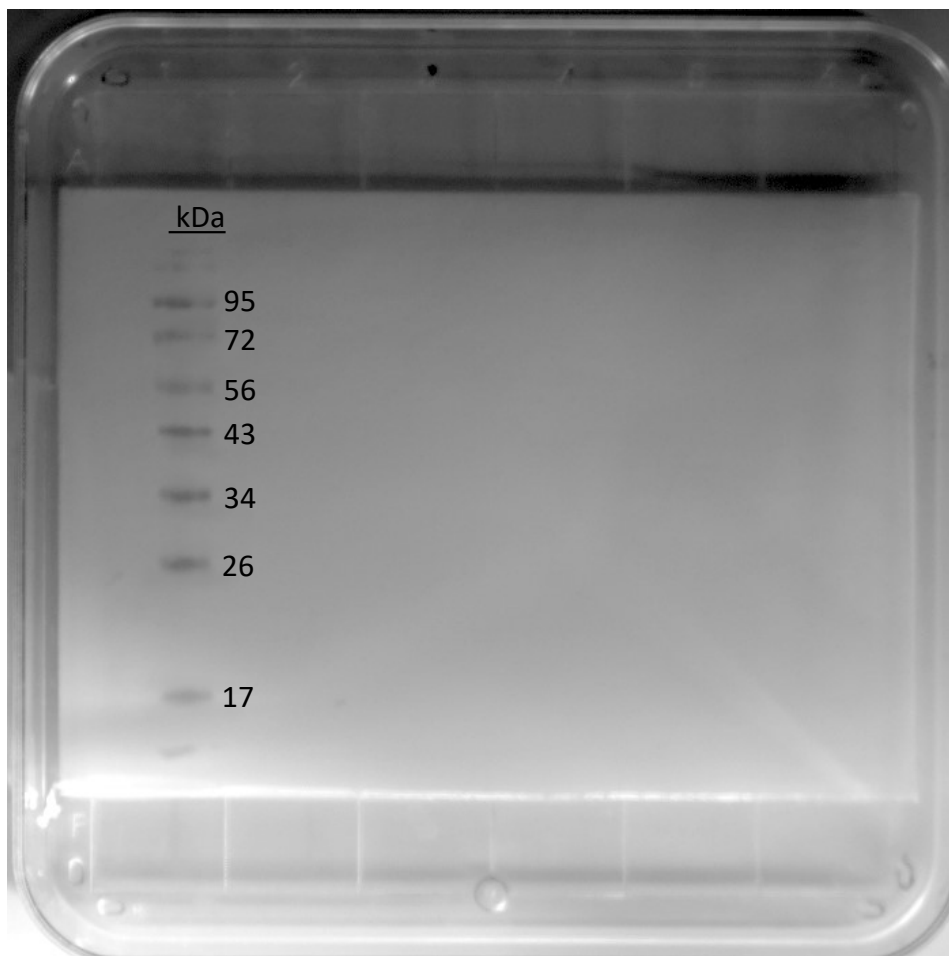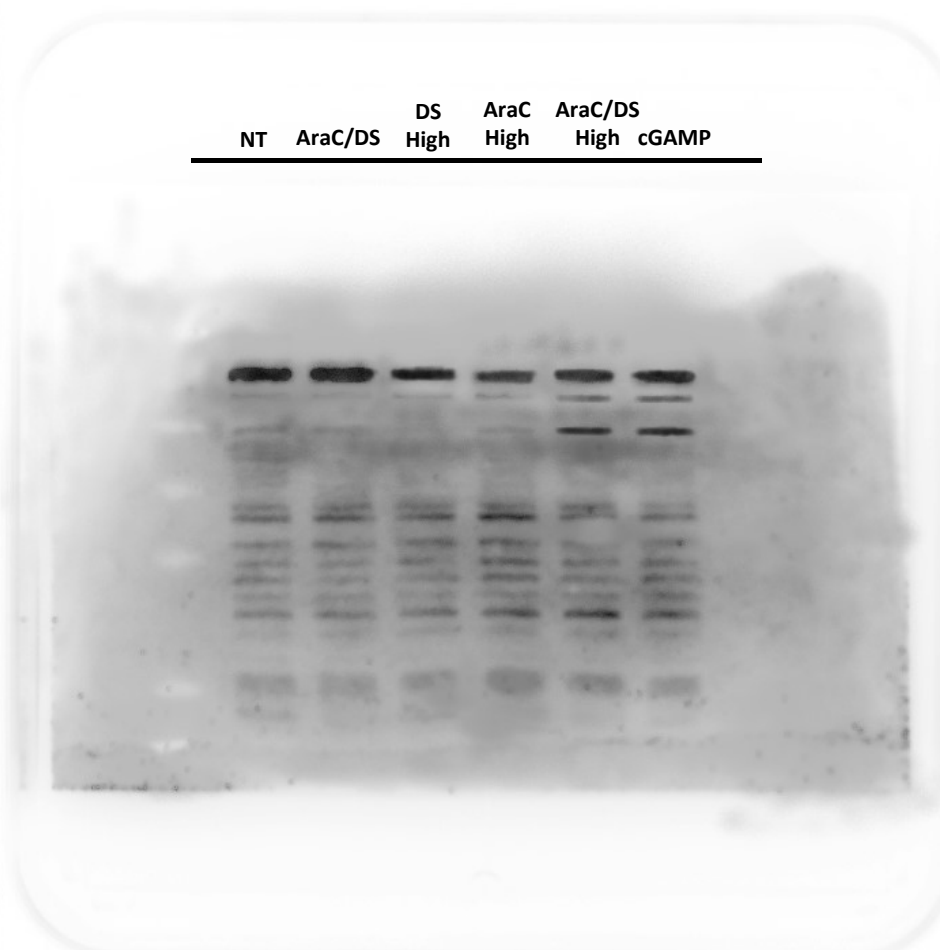

PBMC, 6 hours, GAPDH:

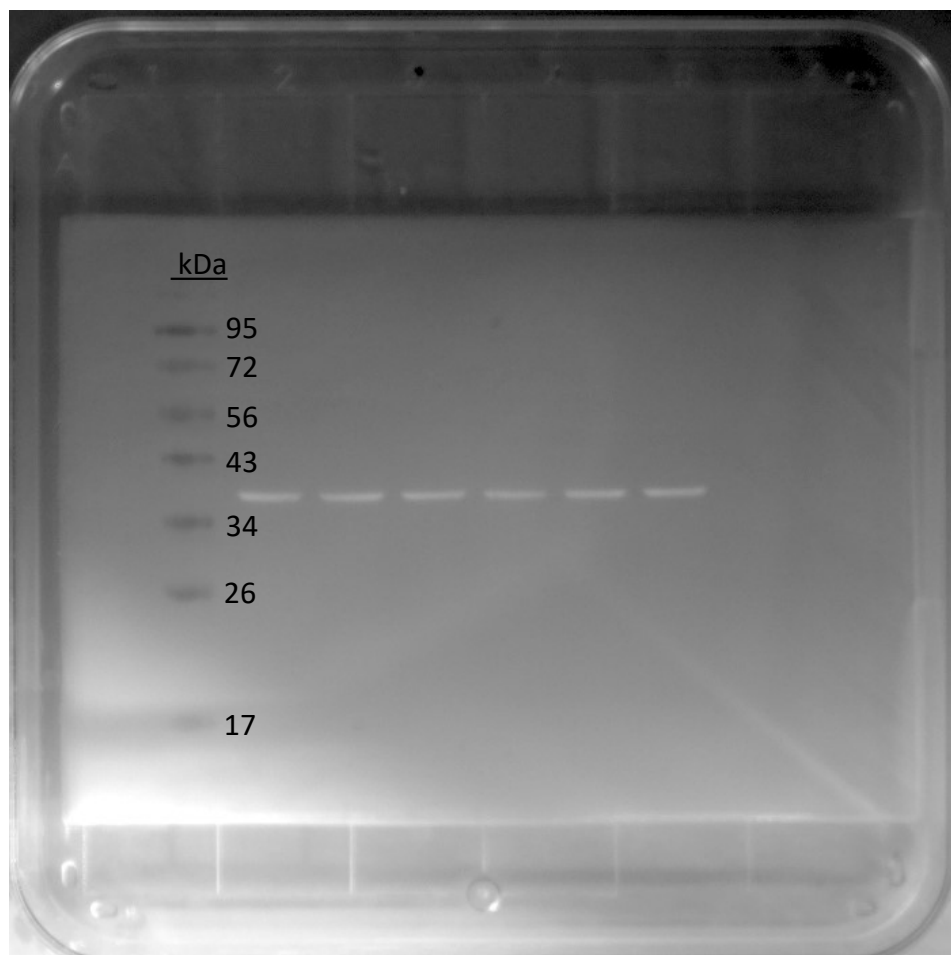

| NT | AraC/DS | DS<br>High | AraC<br>High | AraC/DS<br>High | cGAMP |
|----|---------|------------|--------------|-----------------|-------|
|----|---------|------------|--------------|-----------------|-------|

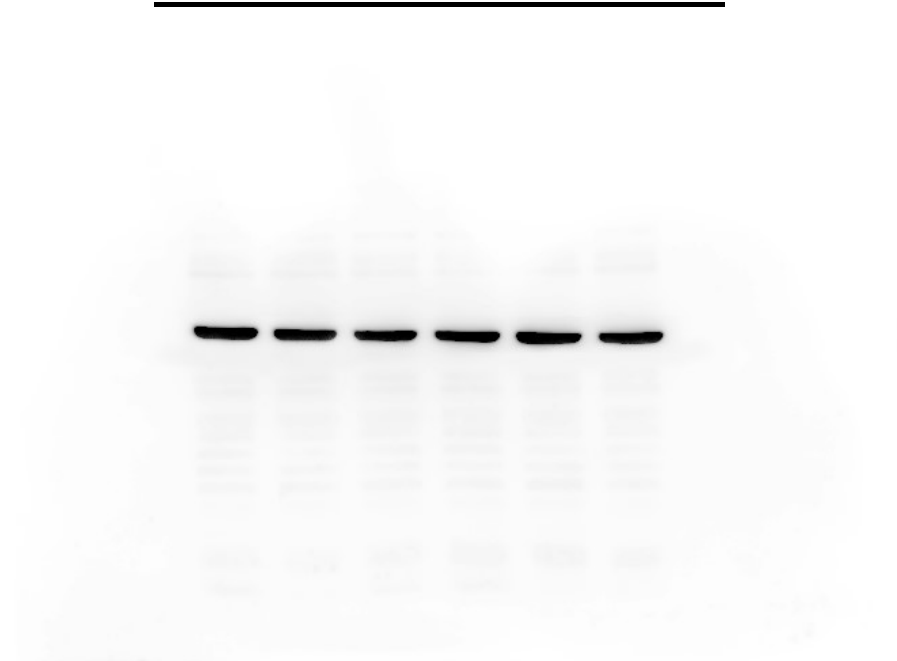

Supplement: s1 [file s1]
